# Supplementary material for: An LED-driven Hematite/Bi 4 O 5 I 2 nanocomposite as an S-scheme heterojunction photocatalyst for efficient degradation of phenolic compounds in real wastewater
Source: Royal Society of Chemistry journal article supplement (doi:10.1039/d4ta07324j), 2024-11-26
Supplement: d4ta07324j1.pdf [file d4ta07324j1.pdf]

1    **Supplementary information**

2    **An LED-driven hematite/Bi<sub>4</sub>O<sub>5</sub>I<sub>2</sub> nanocomposite as an S-scheme heterojunction**  
3    **photocatalyst for efficient degradation of phenolic compounds in real wastewater**

4    *Akash Rawat<sup>a</sup>, Suneel Kumar Srivastava<sup>b,δ</sup>, Chandra Sekhar Tiwary<sup>c</sup>,*

5    *Ashok Kumar Gupta<sup>d,\*</sup>*

6    <sup>a</sup> School of Environmental Science and Engineering, Indian Institute of Technology

7    Kharagpur, Kharagpur 721302, India

8    <sup>b</sup> Department of Chemistry, Indian Institute of Technology Kharagpur,

9    Kharagpur 721302, India

10    <sup>c</sup> Metallurgical and Materials Engineering, Indian Institute of Technology Kharagpur,

11    Kharagpur 721302, India

12    <sup>d</sup> Environmental Engineering Division, Department of Civil Engineering, Indian Institute of

13    Technology Kharagpur, Kharagpur 721302, India

14    \* Corresponding author

15    E-mail address: [agupta@civil.iitkgp.ac.in](mailto:agupta@civil.iitkgp.ac.in)

16

17

18

19

20

<sup>δ</sup> Former faculty member of the Department of Chemistry, Indian Institute of Technology Kharagpur, Kharagpur 721302, India

## **S1. Materials and chemical reagents**

For synthesis of photocatalyst: Hematite ore (acquired from the Department of Mining, IIT Kharagpur) Bismuth (III) nitrate pentahydrate ( $\text{Bi}(\text{NO}_3)_3 \cdot 5\text{H}_2\text{O}$ ;  $\geq 99\%$  purity), Potassium iodide ( $\text{KI}$ ;  $\geq 99\%$  purity), Ethylene glycol ( $\text{C}_2\text{H}_6\text{O}_2$ ;  $\geq 99\%$  purity), Sodium hydroxide ( $\text{NaOH}$ ;  $\geq 99\%$  purity), Hydrochloric acid ( $\text{HCl}$ ; 35%), Ethanol ( $\text{C}_2\text{H}_5\text{OH}$ ;  $\geq 99.9\%$ ). For the study of the influence of co-existing anions: Sodium chloride ( $\text{NaCl}$ ;  $\geq 99.5\%$  purity), Sodium carbonate ( $\text{Na}_2\text{CO}_3$ ;  $\geq 99.5\%$  purity), Sodium dihydrogen phosphate ( $\text{NaH}_2\text{PO}_4$ ;  $\geq 99.99\%$  purity), Sodium bicarbonate ( $\text{NaHCO}_3$ ;  $\geq 99.5\%$  purity), Sodium nitrate ( $\text{NaNO}_3$ ;  $\geq 99.9\%$ ), and Sodium sulphate anhydrous ( $\text{Na}_2\text{SO}_4$ ;  $\geq 99\%$  purity). For radical scavenging studies: Ascorbic acid ( $\text{C}_6\text{H}_8\text{O}_6$ ;  $\geq 99.9\%$ ), Silver nitrate ( $\text{AgNO}_3$ ), and 2-propanol ( $\text{C}_3\text{H}_8\text{O}$ ;  $\geq 99.99\%$  purity). For immobilization: Polyvinyl alcohol (PVA). \* Phenolic compounds used in this study: Bisphenol A ( $((\text{CH}_3)_2\text{C}(\text{C}_6\text{H}_4\text{OH}))_2$ ;  $\geq 99\%$  purity), m-cresol ( $\text{C}_7\text{H}_8\text{O}$ ;  $\geq 99\%$  purity), phenol ( $\text{C}_6\text{H}_5\text{OH}$ ;  $\geq 99\%$  purity). All of the chemicals were used in analytical grade without further purification and purchased from Merck India.

### **\*Preparation of stock solution**

0.1 g of Phenolic compound (BPA or m-cresol A or Phenol) was dissolved in 1000 mL DI water and stirred until completely dissolved. After that, the prepared stock solution of 100 mg/L was kept in the dark ambiance at  $-4^\circ\text{C}$  and diluted according to the experimental requirements.

## **S2. Characterization techniques**

The samples' surface morphology was analyzed using high-resolution (FEG-SEM) on Zeis Merlin Gemini II at an accelerating voltage of 20 kV. The structure and composition of the material were examined using 200 kV high-resolution transmission electron microscopy (HR-TEM) on Talos F200X G2, Thermo Scientific. The XRD patterns of each synthesized material were recorded using

a Malvern PANalytical X'Pert Powder diffractometer with Cu K $\alpha$  radiation ( $\lambda = 0.154$  nm) at a scanning rate of 5° 2 $\theta$  per minute. The 3D profile, topographical, and textural features, including roughness parameters (as per ISO 25178), were obtained from atomic force microscopy (AFM) images recorded using an Agilent 5500 atomic force microscope. The XPS of the material, indicating the available orbital states, was recorded using a PHI 5000 VersaProbe III (ULVAC PHI, Physical Electronics, USA) equipped with a monochromatic Al K $\alpha$  X-ray source and a focused beam adjustable from <10  $\mu$ m to 300  $\mu$ m for rapid X-ray-induced secondary electron imaging (SXI). The system includes a 180° hemispherical electron energy analyzer with a 128-channel detector, an argon ion gun (0-5V) for specimen cleaning, depth profiling, and charge neutralization, and a Gas Cluster Ion Beam (GCIB) (2.5-20 kV Ar) for low-damage surface cleaning. Sample heating and cooling capabilities range from 800 °C to -140 °C. The work function of each material was determined using ultraviolet photoelectric spectroscopy (UPS) and recorded on PHI 5000 VERSA PROBE III (energy source He I). The Brunauer-Emmett-Teller (BET) specific surface area, Barrett-Joyner-Halenda (BJH) pore volume, and nominal pore size were measured using nitrogen adsorption-desorption on an Autosorb iQ Station 1. Prior to analysis, the samples were degassed at 200 °C under vacuum conditions. Photoluminescence PL spectra were obtained from F-4600 fluorescence with an excitation wavelength of 320 nm. UV–visible diffuse reflectance spectroscopy (UV-DRS) was performed from 300 to 800 nm using a Cary 5000 UV-Vis-NIR spectrophotometer equipped with an integrating sphere of diameter 150 mm, and band gap energies were determined by drawing a Tau plot. The Zeta potential of the nanocomposite was analyzed by ZS90 (Malvern Nano Zetasizer). The leaching of Fe and Bi ions was measured by multi-elemental scans using ICP-MS (iCAP PRO, Thermo Scientific, USA). The intermediates of phenolic compounds after certain intervals were identified by LC-MS/MS (WATERS 2695, USA)

### **S3. Experimental setup and procedure**

A lab-scale photocatalytic reactor was developed by integrating several components, including a visible lamp (Lumina 50 Watts LED, 6500 K cool daylight with a luminous flux of 105 lm/w), a magnetic stirrer (Tarsons digital spinnot) with a bead, glass beakers with capacities of 200 mL and 1000 mL, and a box.<sup>1</sup> A white LED light was held 10 cm above the inner beaker of the jacketed beakers. The inner chamber contained the reaction suspension, while the outer beaker facilitated water circulation to provide cooling, maintaining the suspension's temperature at  $25 \pm 5$  °C. For the immobilized photocatalyst experiments, however, all tests were conducted in a 100 mL beaker without any cooling provisions.

The concentrations of phenolic compounds in suspension were analyzed using HPLC (Thermo Fisher Scientific, Ultimate 3000). A reverse phase C18 column measuring 4.6 cm × 250 mm was employed. The mobile phase consisted of a mixture of acetonitrile and deionized water in a 60:40 (V/V) ratio, with a detection wavelength set at 270 nm. The flow rate was kept constant at 1 mL/min, allowing for the detection of BPA, m-cresol, and phenol at retention times of 4.0, 4.53, and 5.2 minutes, respectively. Furthermore, the degradation efficiency and apparent rate constant was measured using the procedure given in our previous study.<sup>1</sup>

### **S4. Procedure for antibacterial assay**

The toxicity assessment of the as-synthesized HBI-30 nanocomposite was conducted using the agar well diffusion test. The same procedure was followed as outlined in the study of <sup>1-4</sup>. Briefly, the investigations used pure strains of water pollution bioindicator *Escherichia coli* (ATCC 8739). After sterilization, nutritional agar was cooled on a flat surface. Fresh overnight *E. coli* cultures were evenly dispersed using a sterile cotton swab after agar plate solidification. Agar in each Petri plate was 6 mm thick. After that, three wells (~6 mm dia.) were cut from the agar plate. The first

well had 20  $\mu$ L of Levofloxacin (positive control), the second well had 20  $\mu$ L of DI (negative control), and the other wells housed 0.5 g/L HBI-30 nanocomposite solutions. After 10 min of diffusion, the agar plate was incubated at 35  $^{\circ}$ C for 24 h, and the zone of inhibition around the well was determined.

A conventional plate count test utilizing CFU count was performed to evaluate the toxicity of aqueous BPA before and after photocatalytic treatment. The sample included 10 mg/L BPA, 5 mg/L m-cresol and 5 mg/L phenol. Nutrient agar was prepared (suspend 28 grams in 1000 mL DI water and heat to boiling to dissolve the medium completely) and sterilized (autoclaving at 15 lbs pressure and 121  $^{\circ}$ C for 15 minutes), then 0.1 mL of the E. coli solution was spread on a Petri dish using the spread plate method. The CFU was counted after incubating the Petri plate at 35  $^{\circ}$ C for 24-48 h. This approach reveals PCs's potential toxicity and microbiological responses to it.

## **S5. Topographical features of HBI-30 nanocomposite**

Table S1 presents the AFM surface roughness parameters, emphasizing the variations among the catalysts (Hematite,  $\text{Bi}_4\text{O}_5\text{I}_2$ , pristine HBI-30, and reused HBI-30). The low Sq value (0.645 nm), combined with the high Ssk (29.9) and Sku (1456) of Hematite, indicates a surface that is relatively smooth, which may limit photocatalytic activity.<sup>5</sup> In contrast,  $\text{Bi}_4\text{O}_5\text{I}_2$  exhibits a higher value of sq (6.84 nm), suggesting rough surface characteristics that may enhance photocatalysis by offering a more active site.<sup>1</sup> The pristine HBI-30 nanocomposite heterojunction showcased a stable surface profile of 5.97 nm Sq, with notably reduced Ssk (7.79) and Sku (90.2), implying a smoother and more homogeneous surface that is advantageous for electron-hole separation. Furthermore, the HBI-30 photocatalyst, which was reused 10 times, demonstrated an increase in surface roughness with a Sq of 10.7 nm, suggesting agglomeration or degradation. Nevertheless, reused HBI-30 preserved Ssk (10.3) and Sku (142) values, indicating a stable surface that makes it acceptable for

extended photocatalytic uses regardless of minor changes in roughness parameters. The findings align with the BET analysis and are clearly illustrated in Fig. S3a-c.

#### **S6. Photocatalytic degradation of m-cresol and phenol**

Fig. S8a shows the photodegradation of *m*-cresol at varying initial concentrations (1–50 mg/L) while keeping other parameters constant ( HBI-30 dose = 0.5 g/L, pH = 6.75, and irradiation time = 80 min). Up to 20 mg/L *m*-cresol, the degradation efficiency reached 100% but decreased to around 71% at 50 mg/L concentration. Similarly, for phenol, 100% degradation was observed at 1 mg/L concentration, which subsequently decreased to 35% at 50 mg/L (Fig. S8b).

#### **S7. Source and characteristics of various water matrices**

To examine the simultaneous photodegradation of PCs in different real water matrices, the water samples were collected from the following sources: tape water - School Environmental Science and Engineering, IIT Kharagpur (India), pond water - pond located in IIT Kharagpur campus (India), river water - Tangsawati river, West Bengal (India), and secondary treatment effluent - Sewage treatment plant, IIT Kharagpur (India). The characteristics of real water matrices are listed in Table S1.

Table S1. Surface roughness parameters for Hematite, Bi<sub>4</sub>O<sub>5</sub>I<sub>2</sub>, HBI-30 (pristine), and HBI-30 (reused).

| Parameters*<br>Catalyst                       | Root mean square height<br>(Sq, nm) | Skewness<br>(Ssk) | Kurtosis<br>(Sku) | Maximum peak height<br>(Sp, nm) | Maximum pit height<br>(Sv, nm) | Maximum height<br>(Sz, nm) | Arithmetic mean height<br>(Sa, nm) |
|-----------------------------------------------|-------------------------------------|-------------------|-------------------|---------------------------------|--------------------------------|----------------------------|------------------------------------|
| $\alpha$ -Fe <sub>2</sub> O <sub>3</sub>      | 0.645                               | 29.9              | 1465              | 51.1                            | 4.50                           | 55.6                       | 0.231                              |
| Bi <sub>4</sub> O <sub>5</sub> I <sub>2</sub> | 6.84                                | 18.5              | 435               | 243                             | 21.7                           | 265                        | 1.16                               |
| HBI-30 (Pristine)                             | 5.97                                | 7.79              | 90.2              | 121                             | 72                             | 193                        | 1.88                               |
| HBI-30 (reused)                               | 10.7                                | 10.3              | 142               | 241                             | 40.6                           | 282                        | 3.04                               |

\* Where, Sq signifies the standard deviation of surface height variation, Ssk quantifies the asymmetry of the surface profile, Kurtosis represents the sharpness of the surface peaks and valleys, Sp denotes the height of the highest peak from the mean plane of the surface, Sv indicates the deepest valley from the mean plane of the surface, Sz is the total profile height (the sum of Sv and Sp), and Sa measures the average deviation of surface height from the mean plane, commonly utilized to assess surface roughness

Table S2. BET and BJH results of Hematite, Bi<sub>4</sub>O<sub>5</sub>I<sub>2</sub>, and HBI-30.

| Catalyst                                        | SSA<br>(m <sup>2</sup> /g) | Pore volume<br>(cc/g) | Average pore<br>radius (Å) |
|-------------------------------------------------|----------------------------|-----------------------|----------------------------|
| <b>Hematite</b>                                 | 18.73                      | 0.01732               | 18.50                      |
| <b>Bi<sub>4</sub>O<sub>5</sub>I<sub>2</sub></b> | 43.43                      | 0.02874               | 20.25                      |
| <b>HBI-30</b>                                   | 30.01                      | 0.04031               | 19.12                      |

Table S3. Characteristics of various water matrices.

| <b>Parameters</b>                                                 | <b>DI water</b> | <b>Tap water</b> | <b>Pond</b> | <b>River<br/>water</b> | <b>Secondary<br/>treatment<br/>effluent</b> |
|-------------------------------------------------------------------|-----------------|------------------|-------------|------------------------|---------------------------------------------|
| pH                                                                | 6.75 ± 0.15     | 7.2 ± 0.15       | 6.62 ± 0.15 | 6.55 ± 0.5             | 6.8 ± 0.2                                   |
| Turbidity (NTU)                                                   | BDL             | 0.25 ± 0.1       | 11.5 ± 0.3  | 9.6 ± 0.3              | 40.8 ± 0.5                                  |
| TSS (mg L <sup>-1</sup> )                                         | BDL             | 5 ± 0.4          | 35 ± 0.4    | 32.5 ± 0.5             | 31 ± 0.4                                    |
| TDS (mg L <sup>-1</sup> )                                         | BDL             | 115 ± 5          | 178 ± 0.5   | 155 ± 0.5              | 305 ± 0.5                                   |
| Chloride (Cl <sup>-</sup> , mg L <sup>-1</sup> )                  | BDL             | 11.5 ± 1         | 29.02 ± 0.6 | 7.8 ± 0.05             | 49.6 ± 0.6                                  |
| Bicarbonate (HCO <sub>3</sub> <sup>-</sup> , mg L <sup>-1</sup> ) | BDL             | 21.2 ± 2         | 125 ± 1     | 145 ± 2                | 106 ± 0.2                                   |
| Sulphahte (SO <sub>4</sub> <sup>2-</sup> , mg L <sup>-1</sup> )   | BDL             | 2.9 ± 1          | 25.2 ± 0.8  | 4.1 ± 1                | 2.6 ± 0.2                                   |
| Nitrate (NO <sub>3</sub> <sup>-</sup> , mg L <sup>-1</sup> )      | BDL             | BDL              | 54.2 ± 0.9  | 3.11 ± 0.2             | 5.75 ± 0.2                                  |
| COD (mg L <sup>-1</sup> )                                         | BDL             | BDL              | 112 ± 0.12  | 62.5 ± 2               | 40 ± 2                                      |



Table S4. Degradation products formed and identified in LC-MS/MS.

| Sr. No. | Degradation product | Compound           | M/Z | Structure                                                                             | Ref. |
|---------|---------------------|--------------------|-----|---------------------------------------------------------------------------------------|------|
| I       |                     | BPA                | 228 | 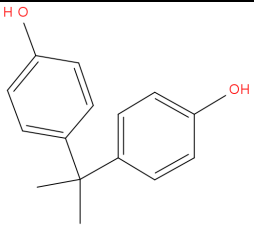   | 1,6  |
| II      |                     | m-cresol           | 109 |    | 7,8  |
| III     |                     | Phenol             | 94  |   | 9,10 |
| 1.      | A                   | 5-Hydroxybisphenol | 244 |  | 1,11 |

|    |    |     |                                                                                       |            |
|----|----|-----|---------------------------------------------------------------------------------------|------------|
| 2. | A1 | 257 | 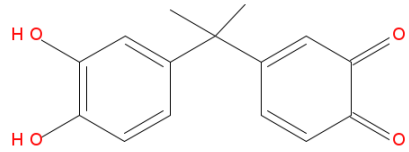   | 1,12,13    |
| 3. | A2 | 242 |    | 1,11       |
| 4. | A3 | 260 |    | 1,14       |
| 5. | A4 | 257 |    | 1,12,14,15 |
| 6. | A5 | 168 |   | 1,14       |
| 7. | A6 | 217 |  | 1,14       |

|     |    |                                                                |     |                                                                                       |           |
|-----|----|----------------------------------------------------------------|-----|---------------------------------------------------------------------------------------|-----------|
| 8.  | A7 |                                                                | 261 | 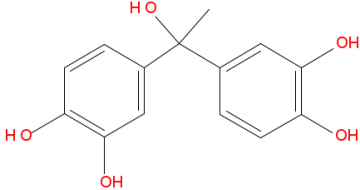   | 1,15,16   |
| 9.  | B  | 2-methoxybenzene-1,4-diol                                      | 141 |    | 17        |
| 10. | B1 | Benzene-1,4-diol or p-Dihydroxybenzene (Hydroquinone) (C6H6O2) | 110 |    | 6,9,14,17 |
| 11. | C  | 4,4'-(1-Methyl-1,2-ethenediyl)bis[phenol]                      | 226 |   | 1         |
| 12. | C1 |                                                                | 154 |  | 17,18     |

|     |    |                                                  |     |                                                                                       |            |
|-----|----|--------------------------------------------------|-----|---------------------------------------------------------------------------------------|------------|
| 13. | C2 | 4-(Prop-1-en-2-yl)phenol                         | 134 | 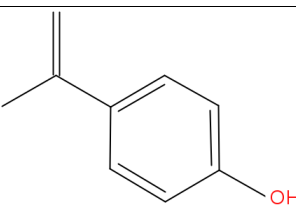   | 1,11,14,15 |
| 14. | C3 | 4-Hydroxyacetophenone                            | 136 |    | 1,11       |
| 15. | C4 | (4-(prop-1-en-2-yl)cyclohexa-3,5-diene-1,2-dione | 147 |    | 1,16       |
| 16. | C5 | Maleic Acid                                      | 116 |   | 1          |
| 17. | D  | 4-Benzylphenol                                   | 199 |  | 1,12       |

|     |    |                                   |     |                                                                                       |        |
|-----|----|-----------------------------------|-----|---------------------------------------------------------------------------------------|--------|
| 18. | D1 | p-Hydroxybenzaldehyde             | 122 | 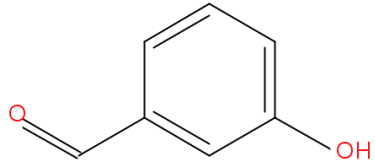   | 1,12   |
| 19. | D2 | 3,4-Dihydroxybenzoic acid         | 153 |    | 1,6,12 |
| 20. | E  |                                   | 241 |    | 1,12   |
| 21. | F  | 2-Phenoxy-2,5-cyclohexadien-1-one | 186 |   | 10     |
| 22. | G  | [1,1'-Biphenyl]-4-ol              | 171 |  | 10     |

|     |    |                                                                                     |     |                                                                                       |    |
|-----|----|-------------------------------------------------------------------------------------|-----|---------------------------------------------------------------------------------------|----|
| 23. | H  | o-Dihydroxybenzene<br>(Catechol)<br>(C <sub>6</sub> H <sub>6</sub> O <sub>2</sub> ) | 110 | 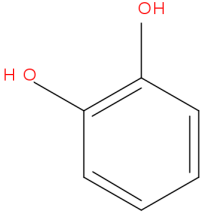   | 9  |
| 24. | I  | Benzoquinone<br>(C <sub>6</sub> H <sub>4</sub> O <sub>2</sub> )                     | 108 |    | 9  |
| 25. | J  | [1,1'-Biphenyl]-4,4'-ol                                                             | 186 |    | 9  |
| 26. | K  | Hydroxyl-<br>hydroquinone                                                           | 126 |   | 10 |
| 27. | K1 | Hydroxyl-<br>benzoquinone<br>``                                                     | 124 |  | 10 |

|     |     |                          |     |                                                                                       |    |
|-----|-----|--------------------------|-----|---------------------------------------------------------------------------------------|----|
| 28. | L   | 3-Hydroxybenzaldehyde    | 122 | 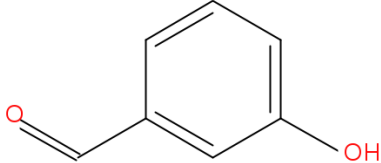   | 19 |
| 29. | M1a | 2-Methylbenzene-1,4-diol | 124 |    | 7  |
| 30. | M1b | 3-Methylbenzene-1,2-diol | 124 |    | 7  |
| 31. | M1c | 4-Methylbenzene-1,2-diol | 124 |    | 7  |
| 32. | M2  | 2-Methyl-p-benzoquinone  | 110 |  | 8  |

|     |    |                           |     |                                                                                       |      |
|-----|----|---------------------------|-----|---------------------------------------------------------------------------------------|------|
| 33. | L1 | 2,5-Dihydroxybenzaldehyde | 138 | 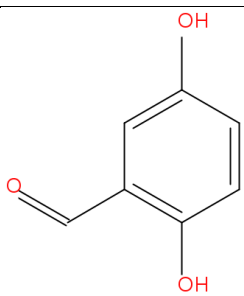   | 6,19 |
| 34. | Z1 | 2-Butanol                 | 75  |    | 1    |
| 35. | Z2 | Acrolein                  | 56  |    | 10   |
| 36. | Z3 | Glycerol                  | 92  |    | 6,10 |
| 37. | Z4 | Heptanoic acid            | 127 |   | 1    |
| 38. | Z5 | Oxalic acid               | 90  |  | 6,8  |



---

39. Z6

Acetic acid

61

1

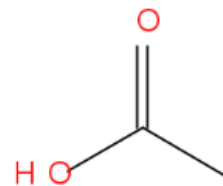

40. Z7

Fumaric acid

116

8,11,14

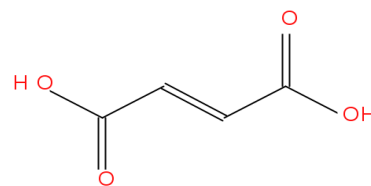

41. Z8

Ethylene glycol

62

1,6

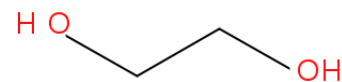

42. Z9

Glycolic acid

77

1,14

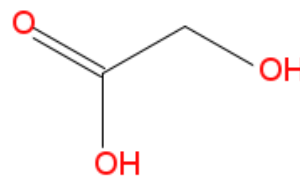

Table S5. Comparison of optimized Hematite/Bi<sub>4</sub>O<sub>5</sub>I<sub>2</sub> heterojunction nanocomposite with the existing heterojunction materials.

| Heterojunction Catalysts                                                                                    | Synthesis method             | Light source  | Catalyst dosage (g/L) | Phenolic compounds concentration (mg/L) | Degradation (%) / time (min) |
|-------------------------------------------------------------------------------------------------------------|------------------------------|---------------|-----------------------|-----------------------------------------|------------------------------|
| Bi <sub>7</sub> O <sub>9</sub> I <sub>3</sub> -Bi <sub>4</sub> O <sub>5</sub> Br <sub>2</sub> <sup>20</sup> | Microwave oven               | 50 W LED lamp | 0.1                   | BPA = 10                                | 97.5/180                     |
| BiOCl/ZnCrZr-LBMO <sup>21</sup>                                                                             | One-pot solvothermal         | 300 W Xe lamp | 0.5                   | BPA = 10                                | 94.2/60                      |
| Bi <sub>4</sub> O <sub>5</sub> Br <sub>2</sub> /α-MnS <sup>22</sup>                                         | Ball-milling processes       | 300 W Xe lamp | 0.5                   | BPA = 20                                | 78/180                       |
| BiOI/ZnO <sup>23</sup>                                                                                      | Solvothermal                 | 300 W Xe lamp | 0.2                   | BPA = 10                                | 95/120                       |
| BiOI/Zn <sub>2</sub> SnO <sub>4</sub> <sup>24</sup>                                                         | Oil bath                     | 300 W Xe lamp | 1.0                   | BPA = 20                                | 99/180                       |
| g-C <sub>3</sub> N <sub>4</sub> /BiOI <sup>25</sup>                                                         | Solvothermal                 | 50 W LED lamp | 1.0                   | BPA = 20                                | 90/120                       |
| β-CD/riboflavin @Bi <sub>2</sub> WO <sub>6</sub> <sup>26</sup>                                              | Hydrothermal                 | 10 W Xe lamp  | 0.2                   | BPA = 10                                | 95/40                        |
| InVO <sub>4</sub> /Bi <sub>5</sub> O <sub>7</sub> I <sup>27</sup>                                           | Hydrothermal and calcination | 24 W LED lamp | 0.04                  | BPA = 20                                | 93.0/90                      |
| Co-W <sub>18</sub> O <sub>49</sub> /PDI <sup>28</sup>                                                       | Chemical precipitation       | 250 W Xe lamp | 0.5                   | BPA = 10                                | 91.2/150                     |
| AgBr/Ag/Bi <sub>5</sub> O <sub>7</sub> I <sup>29</sup>                                                      | Hydrothermal                 | 500 W Xe lamp | 0.4                   | BPA = 20                                | 63/120                       |
| Bi <sub>4</sub> O <sub>5</sub> I <sub>2</sub> /Fe <sub>3</sub> O <sub>4</sub> <sup>30</sup>                 | Solvothermal                 | 300 W Xe lamp | 0.5                   | BPA = 20                                | 89/80                        |
| Fe <sub>3</sub> O <sub>4</sub> /BiOI <sup>31</sup>                                                          | Chemical precipitation       | 800W Xe lamp  | 1.0                   | BPA = 20                                | 100/90                       |

|                                                                                                 |                               |                      |            |                      |                 |
|-------------------------------------------------------------------------------------------------|-------------------------------|----------------------|------------|----------------------|-----------------|
| $\alpha$ -MnO <sub>2</sub> /Bi <sub>7</sub> O <sub>9</sub> I <sub>3</sub> <sup>1</sup>          | Chemical precipitation        | 50 W LED lamp        | 0.5        | BPA = 20             | 97.5/80         |
| V <sub>2</sub> C/Bi <sub>2</sub> WO <sub>6</sub> <sup>32</sup>                                  | Hydrothermal                  | 500 W Xe lamp        | 0.4        | Phenol = 10          | 77.2/120        |
| C@BiOBr <sup>33</sup>                                                                           | Solvothermal                  | 300 W Xe lamp        | 1.0        | Phenol = 50          | 97/90           |
| Bi <sub>4</sub> O <sub>7</sub> /AgBiO <sub>3</sub> <sup>34</sup>                                | Hydrothermal                  | 300 W Xe lamp        | 0.5        | Phenol = 20          | 74.87/120       |
| Bi <sub>4</sub> O <sub>5</sub> I <sub>2</sub> /BiOCl <sup>35</sup>                              | Hydrothermal                  | 300 W Xe lamp        | 0.5        | Phenol = 10          | 100/180         |
| Co–Pd/BiVO <sub>4</sub> <sup>36</sup>                                                           | Hydrothermal                  | 300 W Xe lamp        | 0.8        | Phenol = 20          | 90/180          |
| Bi/COF <sup>37</sup>                                                                            | Solvothermal                  | 300 W Xe lamp        | 1.0        | Phenol = 20          | 99/70           |
| N–Bi <sub>2</sub> O <sub>2</sub> CO <sub>3</sub> /g-C <sub>3</sub> N <sub>4</sub> <sup>38</sup> | Hydrothermal                  | 300 W Xe lamp        | 1.0        | m-cresol = 25        | 97.29/180       |
| <b>Hematite/Bi<sub>4</sub>O<sub>5</sub>I<sub>2</sub></b>                                        | <b>Chemical precipitation</b> | <b>50 W LED lamp</b> | <b>0.5</b> | <b>BPA = 20</b>      | <b>100/80</b>   |
| <b>(This work)</b>                                                                              |                               |                      |            | <b>m-cresol = 20</b> | <b>100/80</b>   |
|                                                                                                 |                               |                      |            | <b>Phenol = 20</b>   | <b>52.36/80</b> |

---

## Reference:

- 1 A. Rawat, S. K. Srivastava, C. S. Tiwary and A. K. Gupta, *J. Environ. Chem. Eng.*, 2024, **12**, 112879.
- 2 V. K. Parida, S. K. Srivastava, S. Chowdhury and A. K. Gupta, *Chem. Eng. J.*, 2023, **472**, 144969.
- 3 A. Majumder, A. Kumar, P. Sarathi and M. Varma, *J. Environ. Chem. Eng.*, 2021, **9**, 104812.
- 4 A. Majumder, A. K. Gupta and M. Sillanpää, *Colloids Surfaces A Physicochem. Eng. Asp.*, 2022, **648**, 129250.
- 5 Y. Zhang, E. K. Stefanakos and D. Yogi Goswami, *Build. Environ.*, 2013, **61**, 188–196.
- 6 Y. Chu, B. Miao, X. Zheng and H. Su, *Sep. Purif. Technol.*, 2021, **272**, 118866.
- 7 E. Zarei, *Int. J. Ind. Chem.*, 2018, **9**, 285–294.
- 8 Y. Chu, D. Zhang, L. Liu, Y. Qian and L. Li, *J. Hazard. Mater.*, 2013, **252–253**, 306–312.
- 9 L. Liu, H. Liu, Y.-P. Zhao, Y. Wang, Y. Duan, G. Gao, M. Ge and W. Chen, *Environ. Sci. Technol.*, 2008, **42**, 2342–2348.
- 10 T. T. T. Dang, S. T. T. Le, D. Channei, W. Khanitchaidecha and A. Nakaruk, *Res. Chem. Intermed.*, 2016, **42**, 5961–5974.
- 11 S. Zhang, H. Lan, Y. Cui, X. An, H. Liu and J. Qu, *Environ. Sci. Technol.*, 2022, **56**, 3552–3563.
- 12 Q. Wang, Y. Cao, Y. Yu, C. Zhang, J. Huang, G. Liu, X. Zhang, Z. Wang, H. Ozgun, M. E. Ersahin and W. Wang, *Chemosphere*, 2022, **308**, 136276.
- 13 A. Mondal, S. Sarkar and U. G. Nair, *Water Sci. Technol.*, 2021, **83**, 322–330.

- 14 T. Ahamad, M. Naushad, Y. Alzahrani and S. M. Alshehri, *J. Mol. Liq.*, 2020, **311**, 113339.
- 15 Y. Kanigaridou, A. Petala, Z. Frontistis, M. Antonopoulou, M. Solakidou, I. Konstantinou, Y. Deligiannakis, D. Mantzavinos and D. I. Kondarides, *Chem. Eng. J.*, 2017, **318**, 39–49.
- 16 X. Jiang, X. He, H. Huang, Y. Li, J. Yang, J. Mei and S. Cui, *J. Alloys Compd.*, 2023, **963**, 171221.
- 17 B. Kim, J. Jang and D. S. Lee, *Chemosphere*, 2022, **289**, 133040.
- 18 A. Garg, T. Singhanian, A. Singh, S. Sharma, S. Rani, A. Neogy, S. R. Yadav, V. K. Sangal and N. Garg, *Sci. Rep.*, 2019, **9**, 765.
- 19 Y. Abdollahi, A. Zakaria and N. A. Sairi, 2014, **42**, 1292–1297.
- 20 A. Chachvalvutikul, T. Luangwanta, B. Inceesungvorn and S. Kaowphong, *J. Colloid Interface Sci.*, 2023, **641**, 595–609.
- 21 Y. Chen, D. Zhu, S. Xue, H. Wang, Q. Lu, G. Ruan, C. Zhao and F. Du, *Appl. Surf. Sci.*, 2024, **653**, 159337.
- 22 F. Chang, S. Zhao, Y. Lei, S. Peng, D. Liu and Y. Kong, *Sep. Purif. Technol.*, 2023, **304**, 122324.
- 23 C. Zhang, W. Fei, H. Wang, N. Li, D. Chen, Q. Xu, H. Li, J. He and J. Lu, *J. Hazard. Mater.*, 2020, **399**, 123109.
- 24 T. Yan, H. Liu, M. Sun, X. Wang, M. Li, Q. Yan, W. Xu and B. Du, *RSC Adv.*, 2015, **5**, 10688–10696.
- 25 J. Zhang, J. Fu, Z. Wang, B. Cheng, K. Dai and W. Ho, *J. Alloys Compd.*, 2018, **766**, 841–850.

- 26 Q. Lu, L. Di, Y. Zhou and Y. Zhou, *Sep. Purif. Technol.*, 2025, **353**, 128099.
- 27 Y. Li, Y. Li, L. Huang, S. Liu, M. Zhu, L. Qiu, J. Huang, Y. Fu and L. Huang, *J. Colloid Interface Sci.*, 2025, **677**, 234–249.
- 28 J. Liu, X. Gao, R. Wang, S. Zhu, X. Zhu, X. Zhu, D. Li, Q. Ruan, M. Cheng, B. Wang, H. Li, H. Xu and P. K. Chu, *Colloids Surfaces A Physicochem. Eng. Asp.*, 2024, **703**, 135050.
- 29 H. Ding, Y. Guan, Z. Wang, Y. Yamauchi, Y. Asakura and Q. Han, *J. Alloys Compd.*, 2024, **1002**, 175215.
- 30 F. Chang, H. Chen, X. Zhang, B. Lei and X. Hu, *Sep. Purif. Technol.*, 2020, **238**, 116442.
- 31 S. Gao, C. Guo, J. Lv, Q. Wang, Y. Zhang, S. Hou, J. Gao and J. Xu, *Chem. Eng. J.*, 2017, **307**, 1055–1065.
- 32 K. Li, J. Zhu, W. Zhou, L. Sun and S. Tian, *Ceram. Int.*, 2024, **50**, 23694–23709.
- 33 Z. Han, Y.-G. Liu, R. Zhang, J. Shi, Y. Jia, X. Liu and H.-Y. Jiang, *Langmuir*, , DOI:10.1021/acs.langmuir.4c01829.
- 34 Z. Jia, J. Liu, R. Li, C. Fan and Y. Wang, *Mater. Sci. Semicond. Process.*, 2024, **177**, 108359.
- 35 Y. Zhong, C. Wu, D. Chen, J. Zhang, Y. Feng, K. Xu, W. Hao, H. Ding, G. Lv, Y. Du and L. Wang, *Appl. Catal. B Environ.*, 2023, **329**, 122554.
- 36 S. Wang, H. Luo, X. Xu, Y. Bai, X. Song, J. Zhang, J. Li, J. Zhao and C. Tang, *Surfaces and Interfaces*, 2016, **5**, 39–46.
- 37 S.-H. Ma, W.-L. Jin, W. Li, H.-Y. Wang, L.-N. Zhu, M. Zeng and D.-M. Kong, *ACS Appl. Nano Mater.*, 2023, **6**, 14151–14164.
- 38 Y. Huang, M. Li, X. Zhang, B. Xing, Y. Ye and Y. Zeng, *Environ. Res.*, 2024, **242**, 117771.

## Revised supplementary Figures

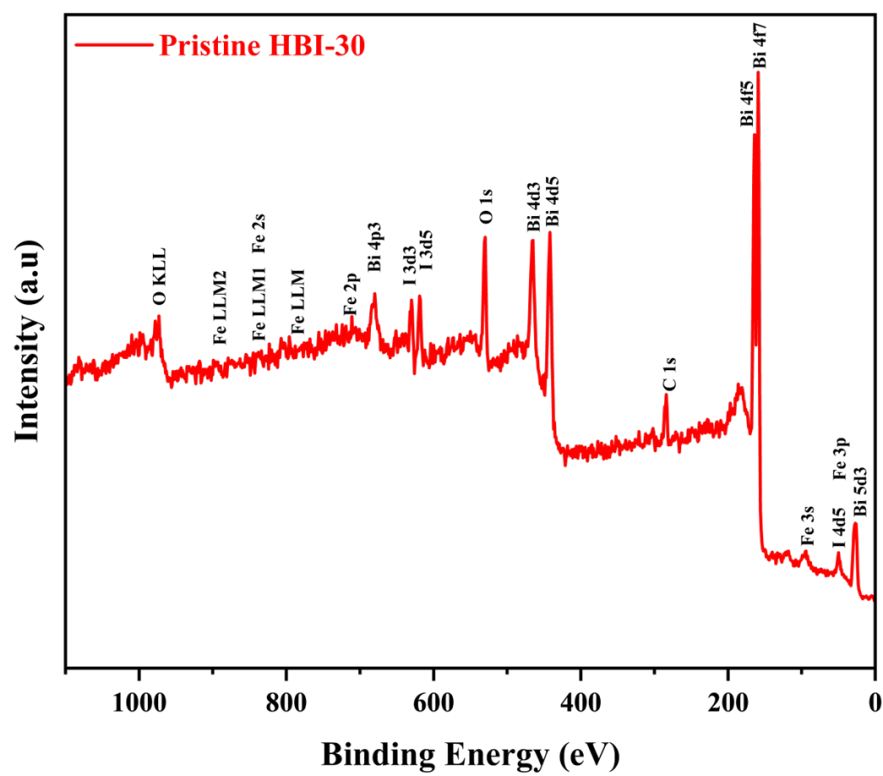

Fig. S1. XPS survey spectrum of HBI-30.

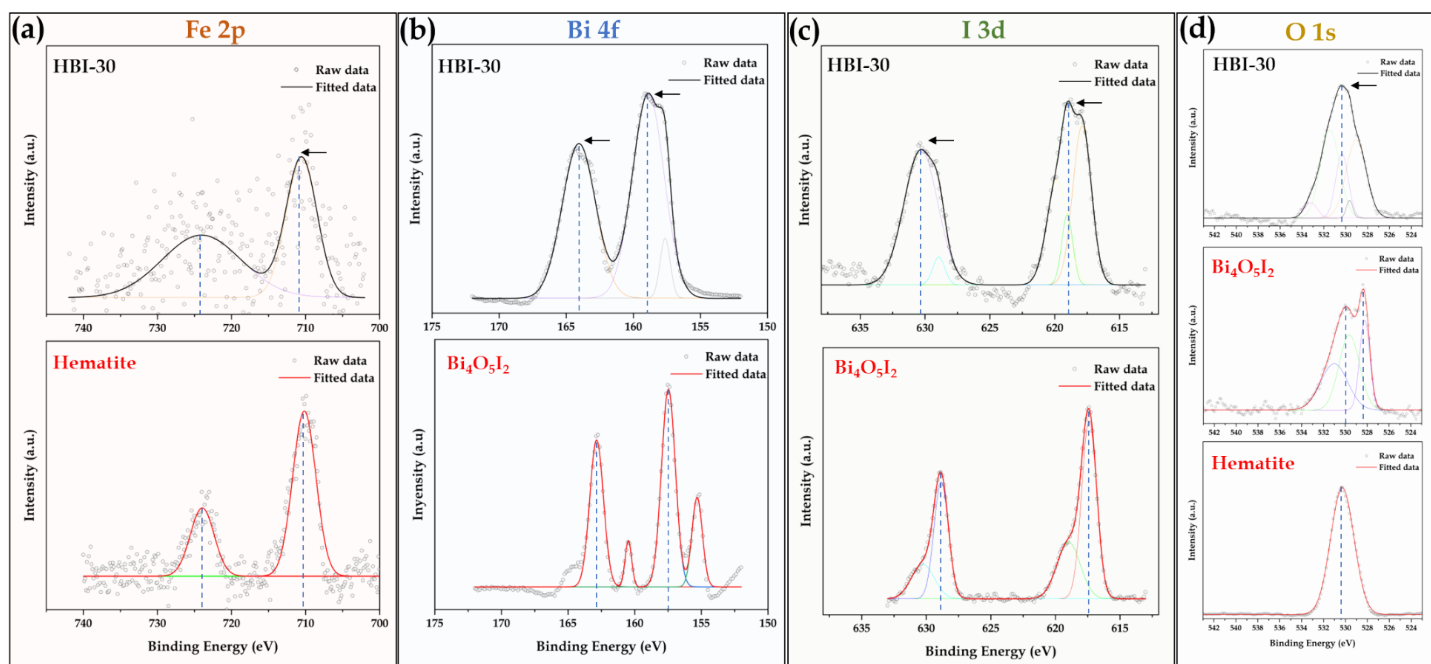

Fig. S2. XPS Comparison of pristine (Hematite and Bi<sub>4</sub>O<sub>5</sub>I<sub>2</sub>) with HBI-30 composite, (a) Fe 2p, (b) Bi 4f, (c) I 3d, and (d) O 1s.



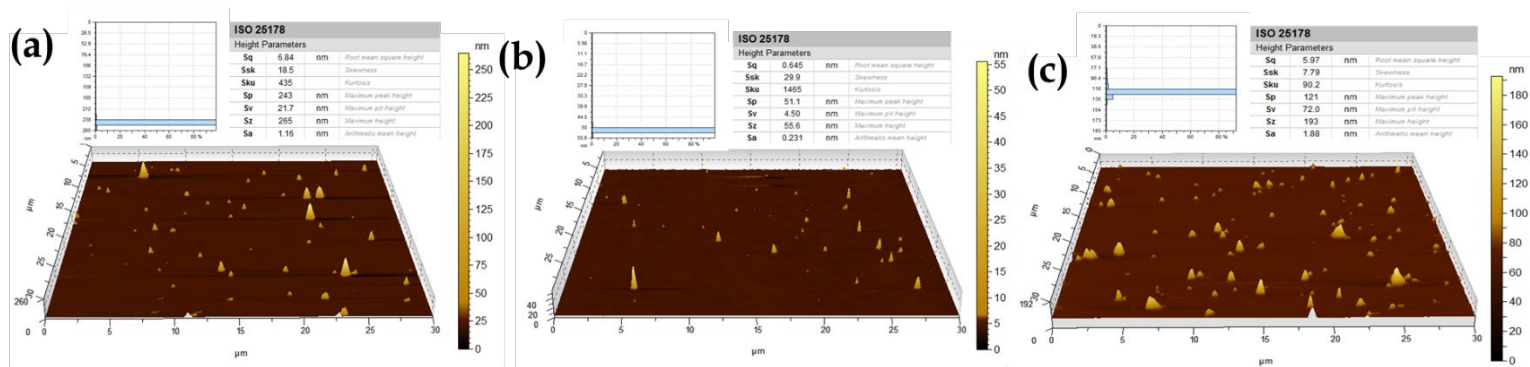

Fig. S3. AFM 3D topology of (a) hematite, Bi<sub>4</sub>O<sub>5</sub>I<sub>2</sub>, HBI and inset of each Fig. (a-c) histogram and height parameters of hematite, Bi<sub>4</sub>O<sub>5</sub>I<sub>2</sub>, and HBI-30.

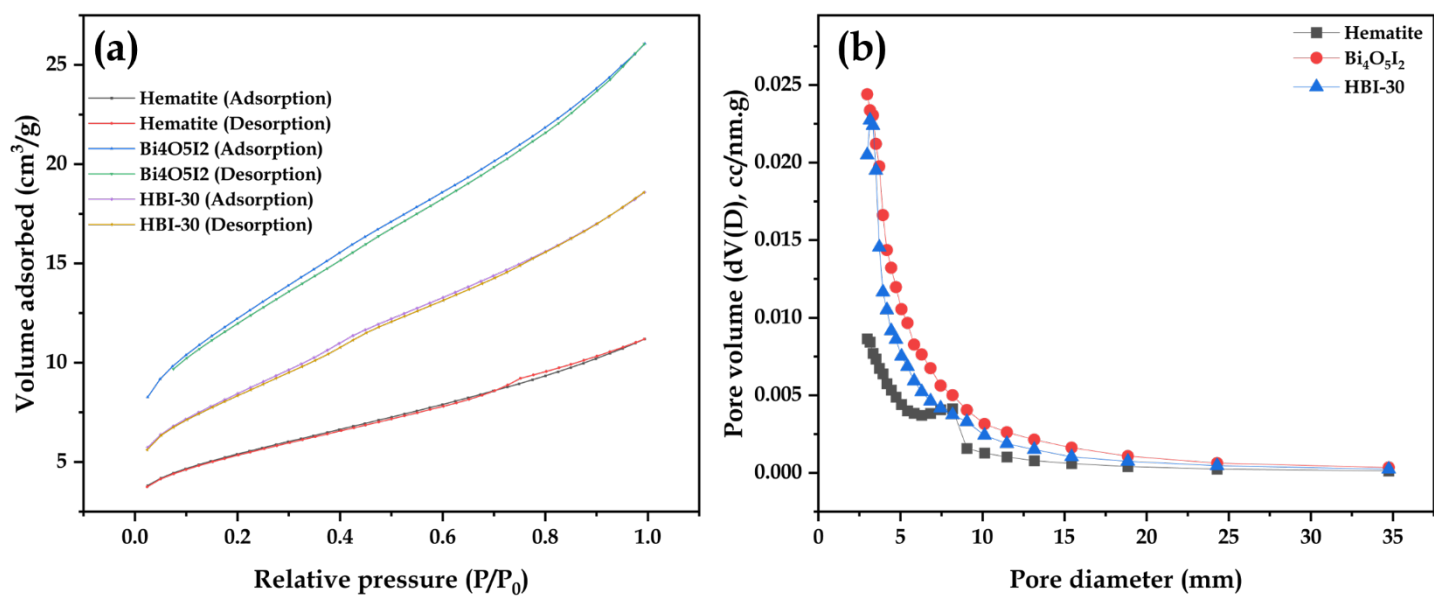

Fig. S4. (a)  $\text{N}_2$  adsorption/desorption isotherms, and (b) pore size distribution curves for Hematite,  $\text{Bi}_4\text{O}_5\text{I}_2$ , and HBI-30.

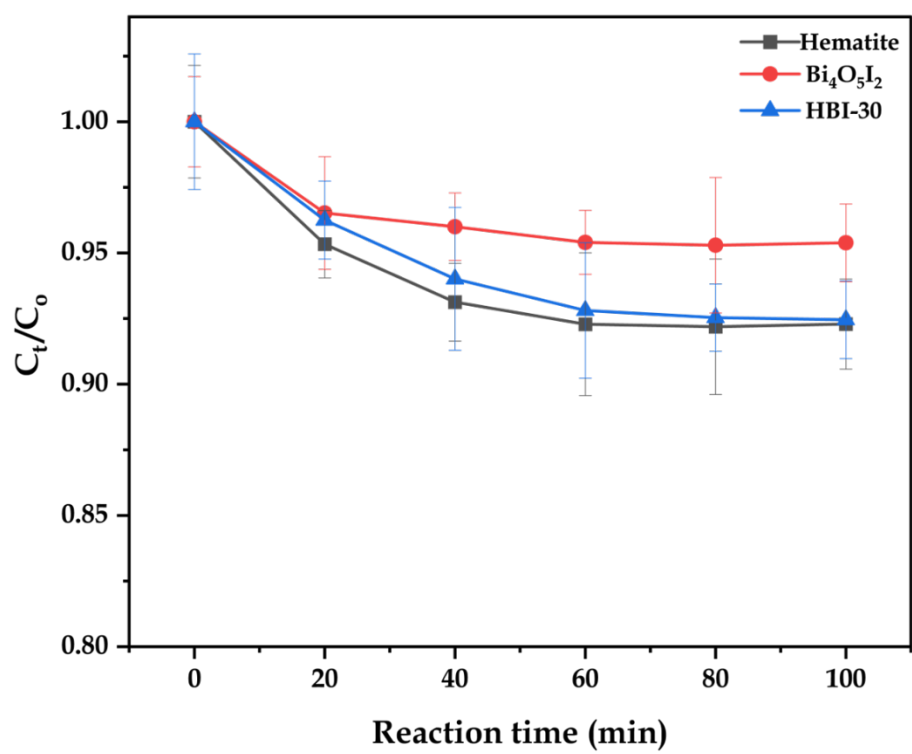

Fig. S5. (a) Adsorption/desorption of BPA (10 mg/L) on Hematite, Bi<sub>4</sub>O<sub>5</sub>I<sub>2</sub>, andf HBI-30.

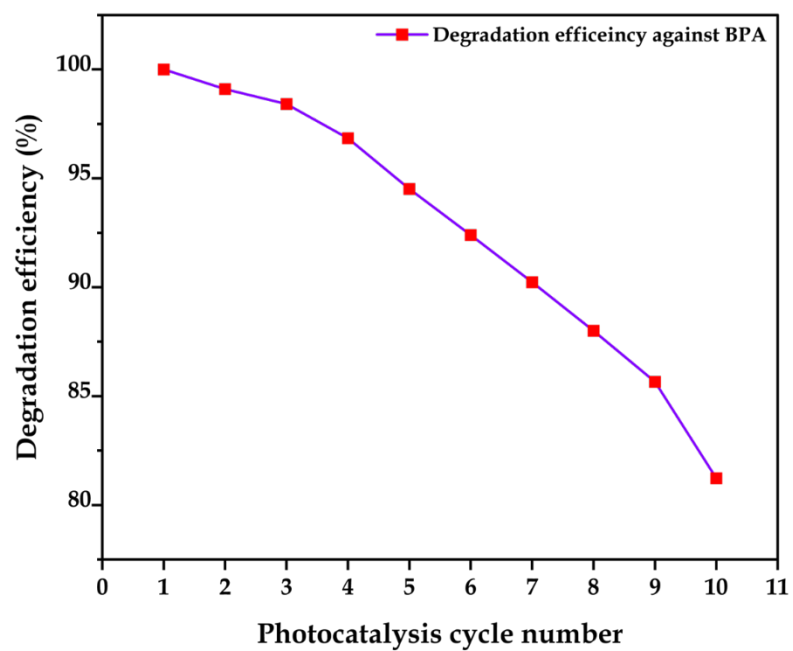

Fig. S6. Reusability test of HBI-30, up to ten cycles.

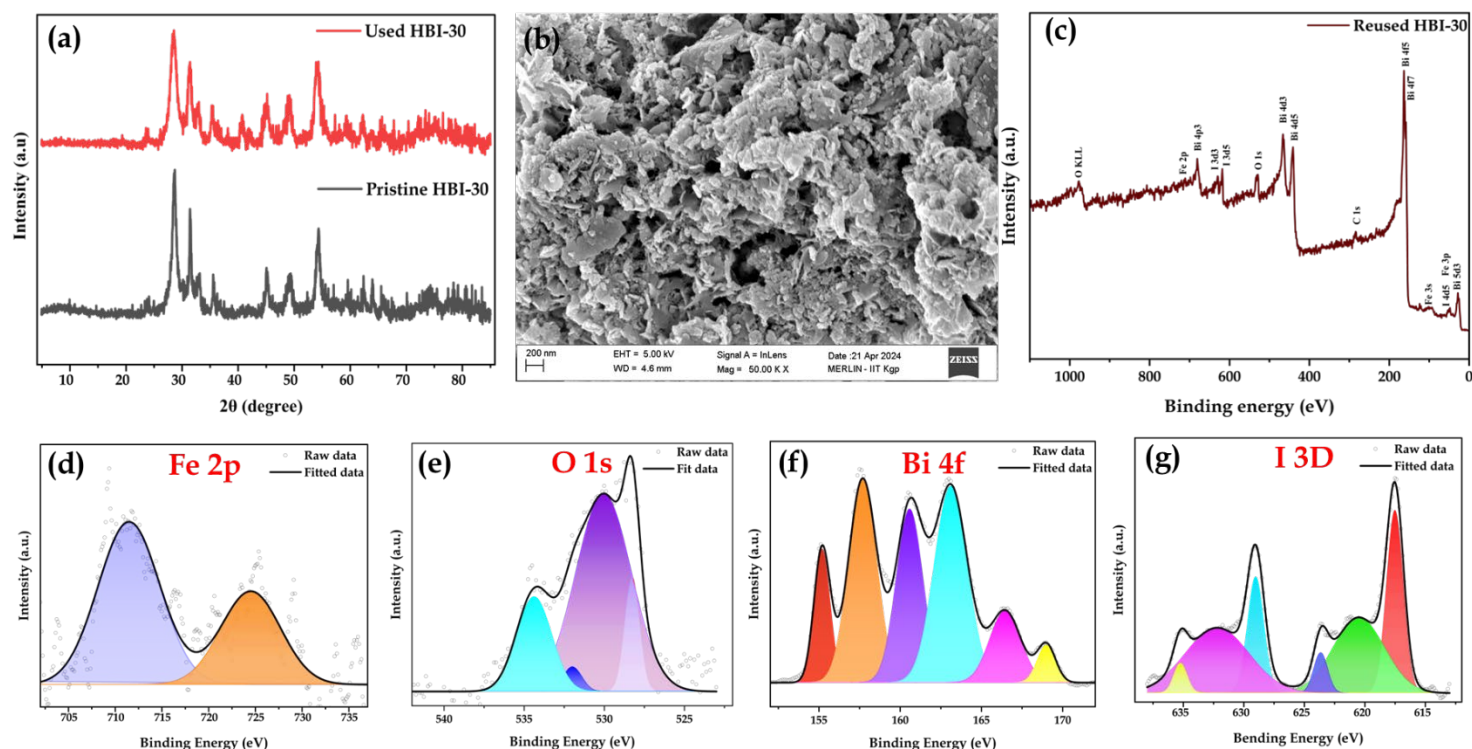

Fig. S7. (a) XRD pattern of unused and reused HBI-30, (b) FEG-SEM image and (c) XPS survey scan of reused HBI-30, and deconvoluted XPS spectra for (d) Fe 2p, (e) O 1s, (f) Bi 4f, and (g) I 3D.

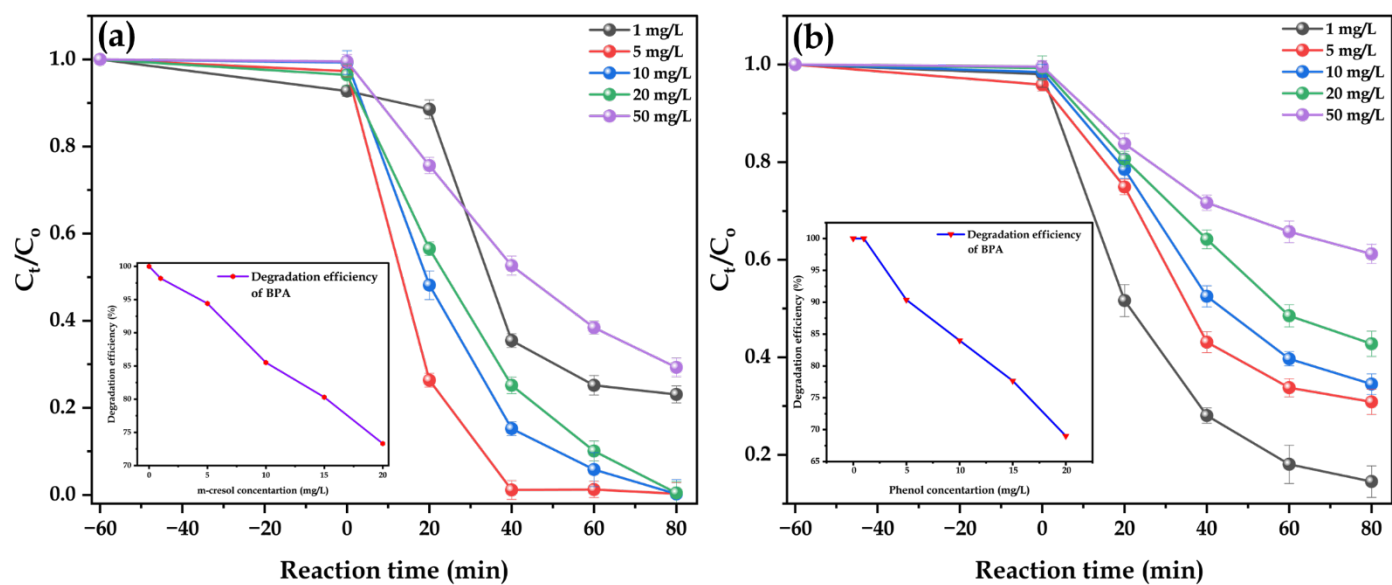

Fig. S8. Photocatalytic degradation of (a) m-cresol and (b) phenol, with insets showing the effect of their varying concentrations on BPA degradation efficiency.

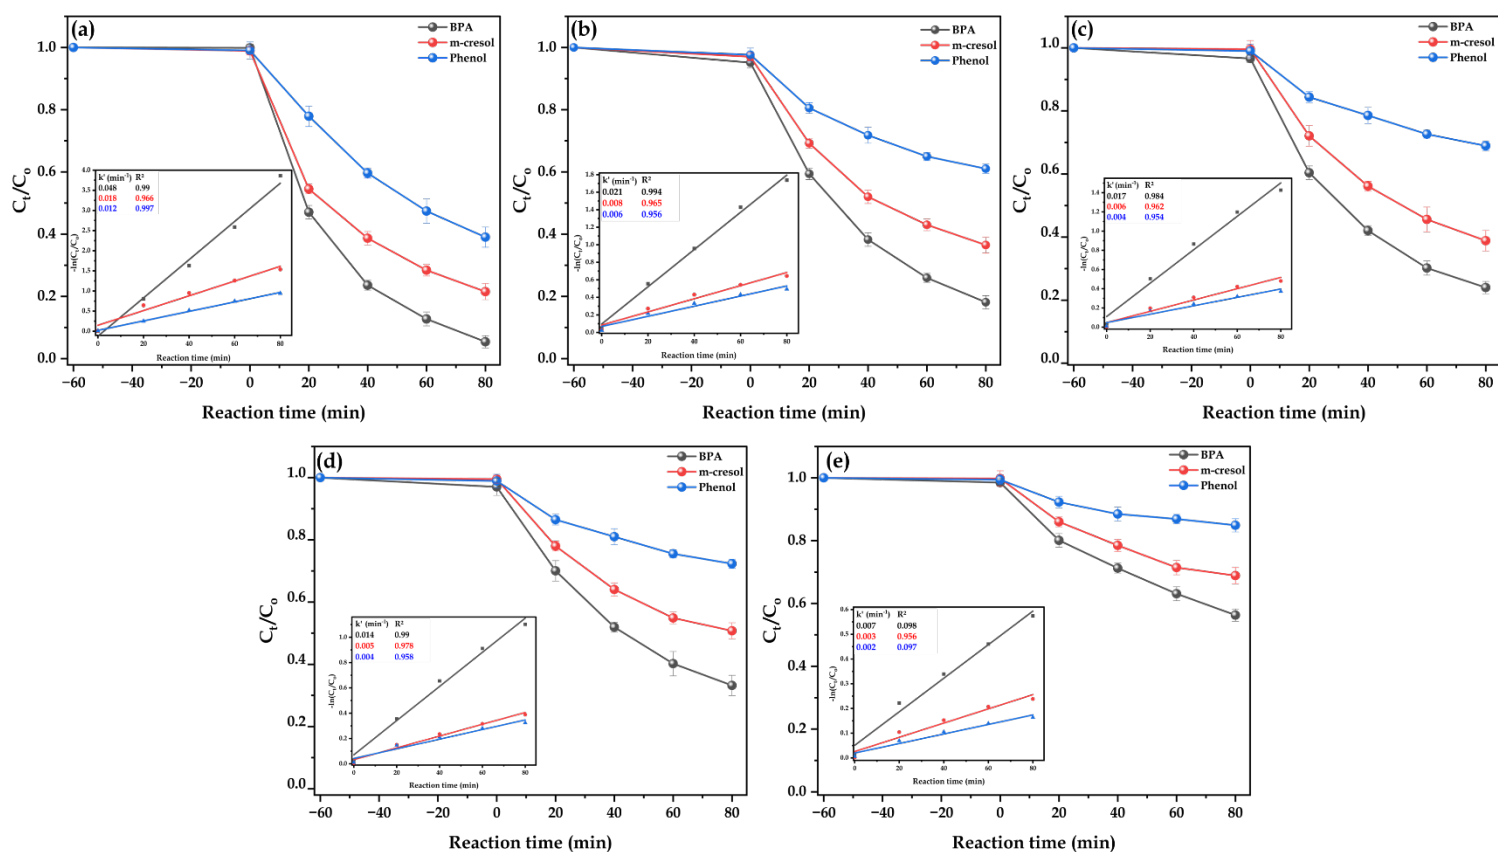

Fig. S9. Simultaneous degradation of phenolic compounds in different water matrices, (a) DI water, (b) tap water, (c) river water, (d) pond water, and (e) secondary effluent of the wastewater treatment plant, with inset of kinetic model for respective figures.

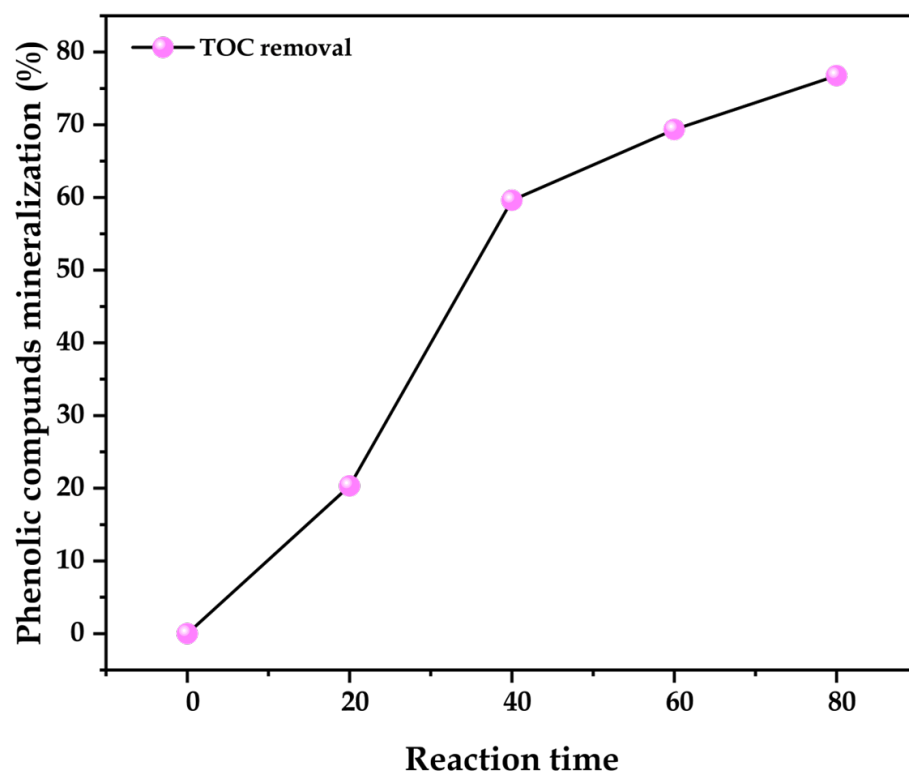

Fig. S10. TOC removal under operational parameters: initial concentration of BPA, m-cresol, and phenol is 10, 5, and 5,mg/L respectively; catalyst dose = 0.5 g/L; pH = 6.75.



(a)

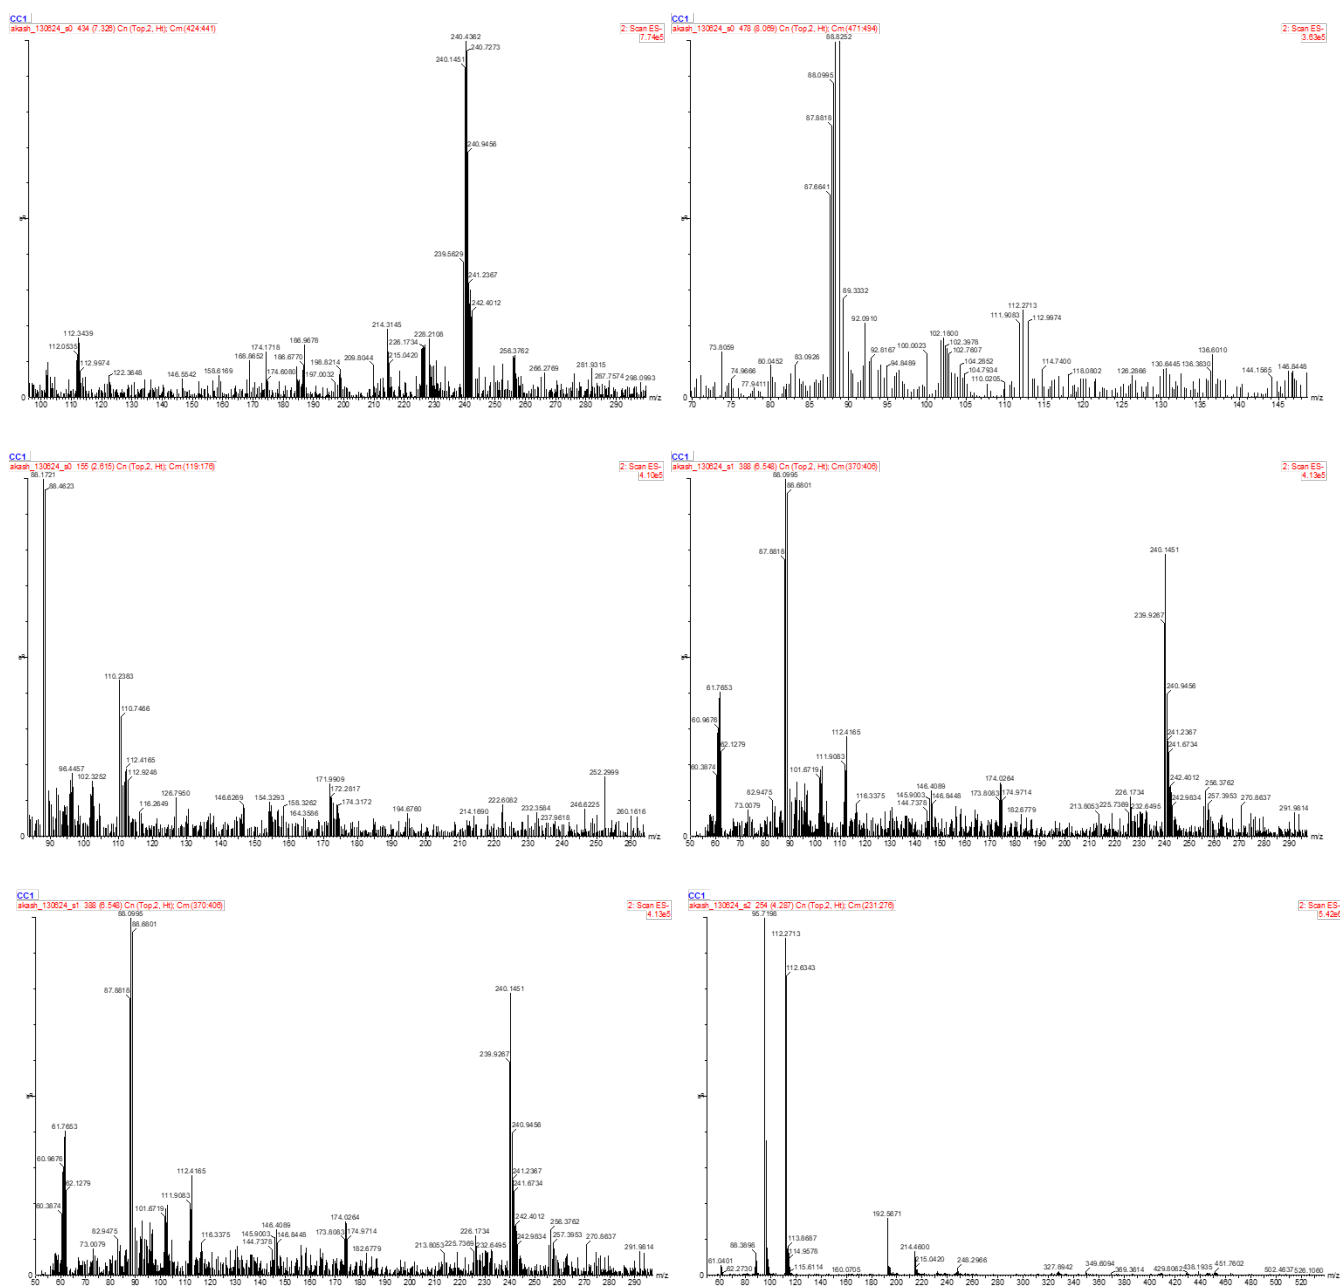

Fig. S11a. LC-MS/MS-identified peaks of degradation products after photocatalytic degradation of phenolic compounds (Part I/III).

(b)

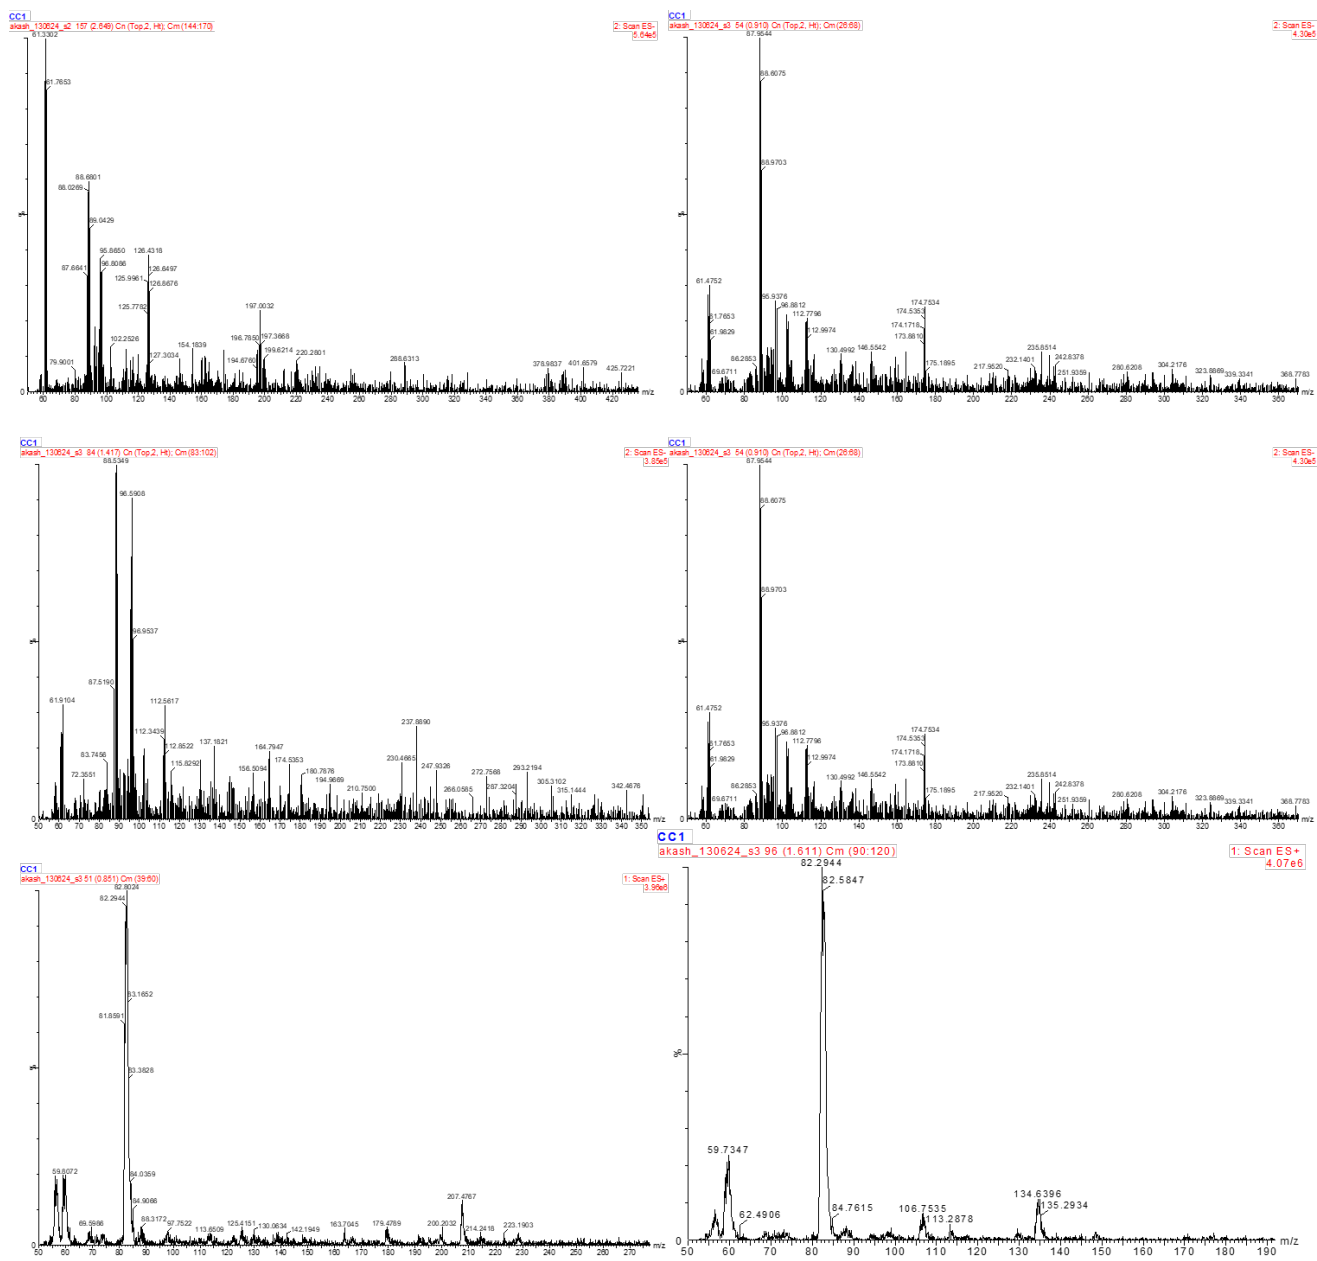

Fig. S11b. LC-MS/MS-identified peaks of degradation products after photocatalytic degradation of phenolic compounds (Part II/III).

(c)

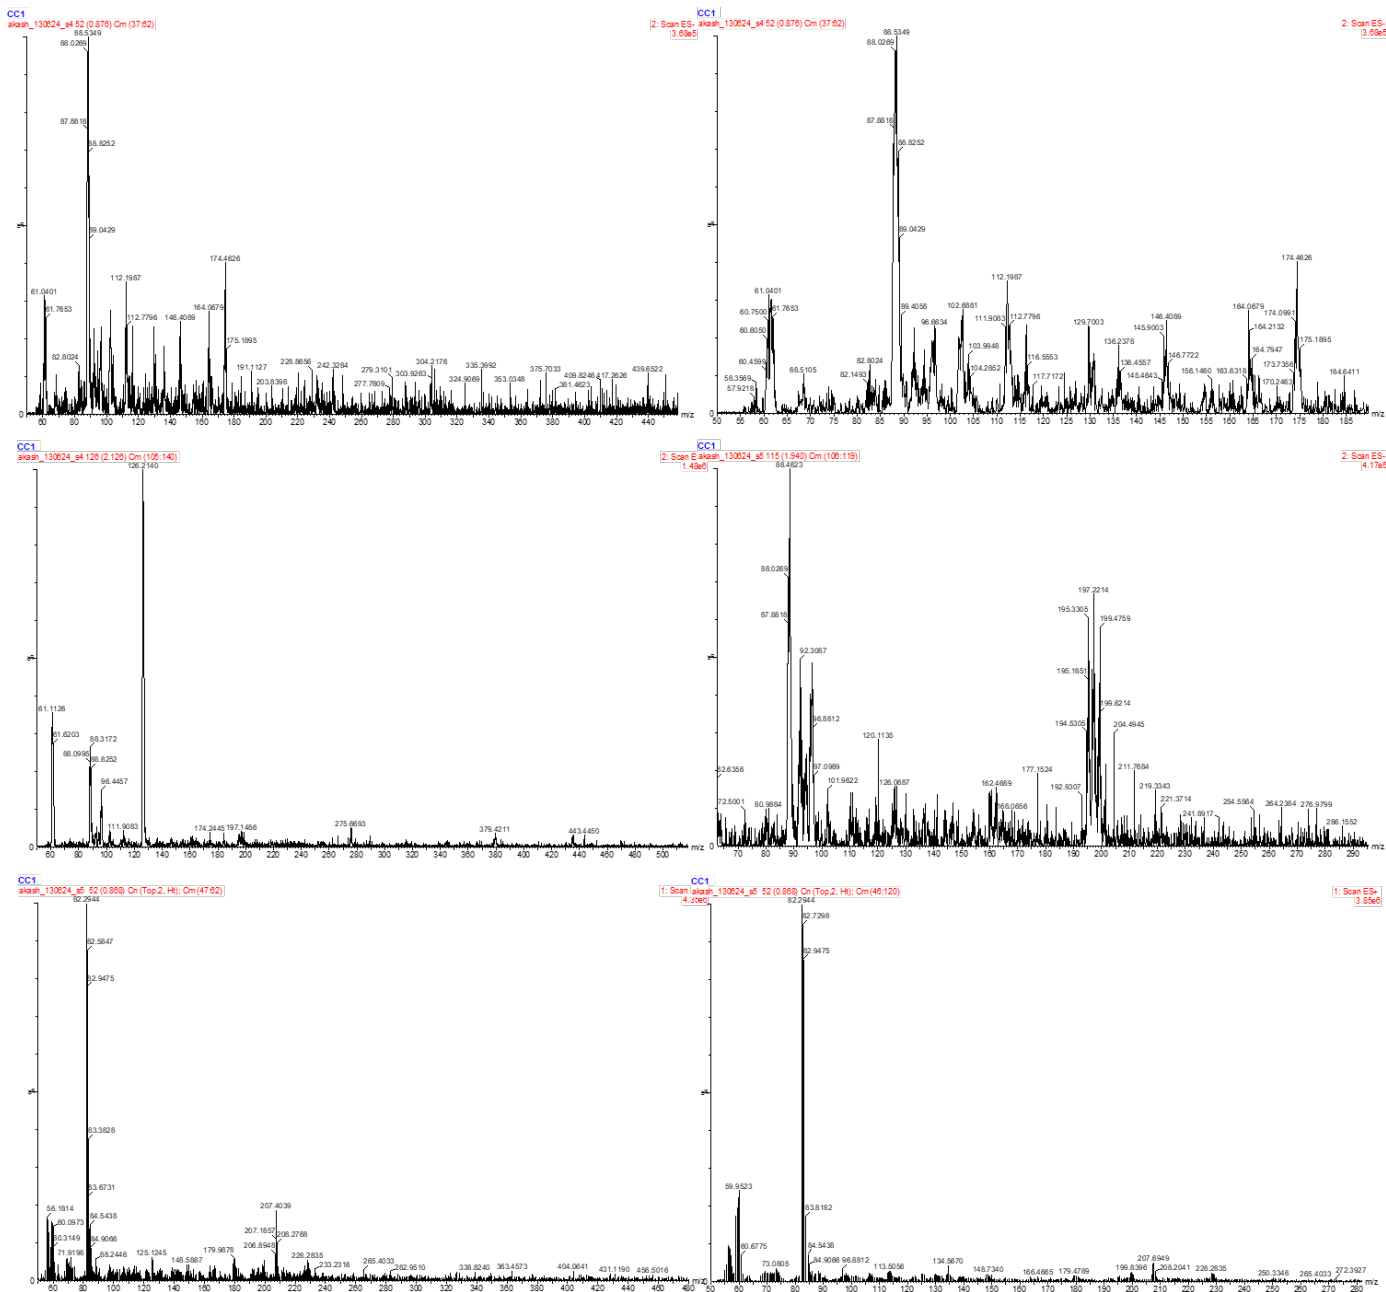

Fig. S11c. LC-MS/MS-identified peaks of degradation products after photocatalytic degradation of phenolic compounds (Part III/III).



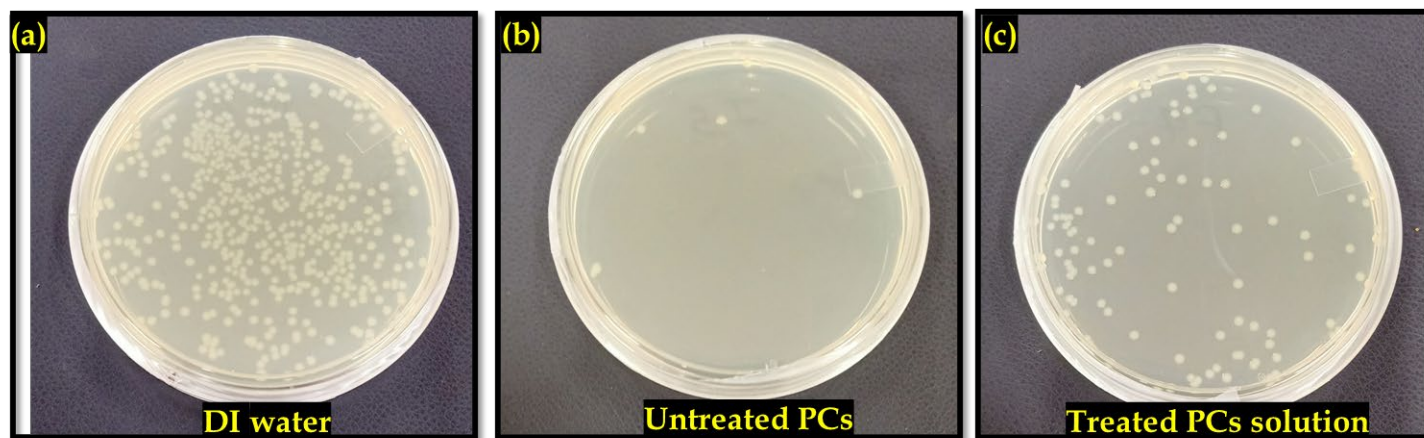

Fig. S13. Colony count test against *E.coli* of treated, (a) DI water, untreated PCs (BPA ,20 mg/L + m-cresol ,10 mg/L + Phenol ,10 mg/L) solution, and treated PCs solution.

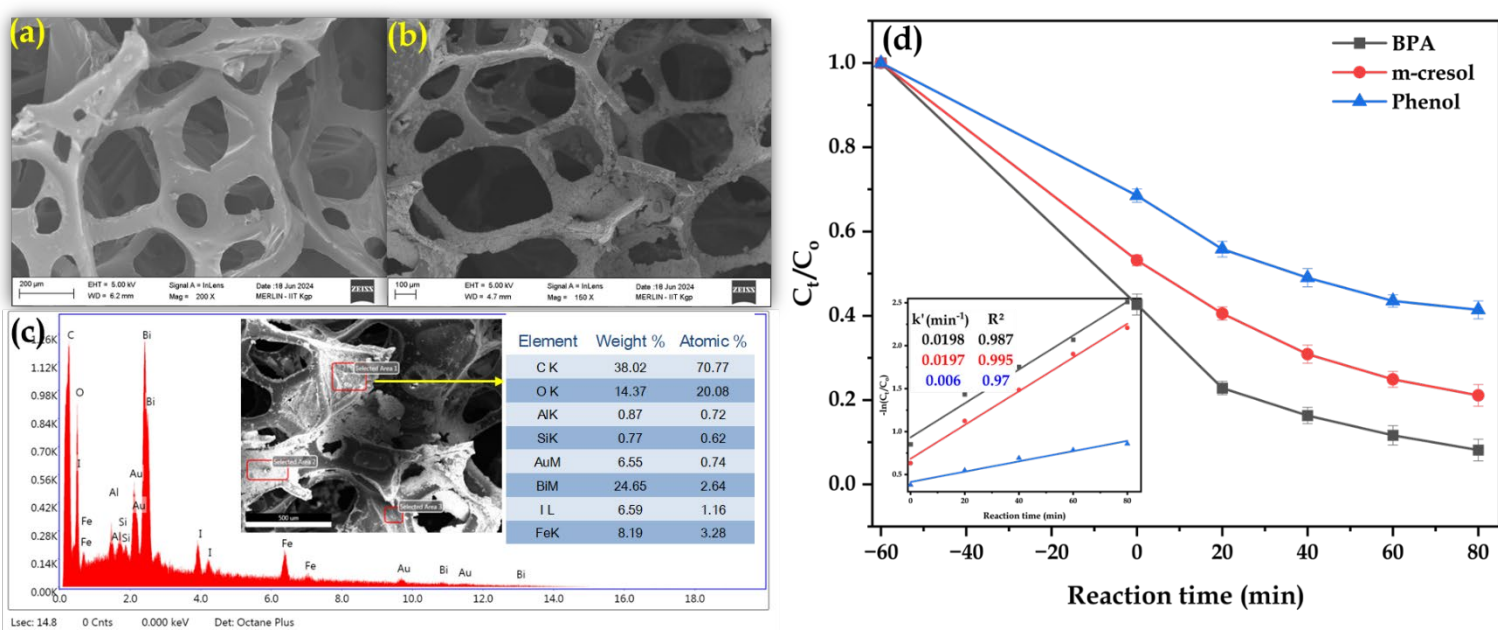

Fig. S14. FEG-SEM image of (a) pristine and (b) coated PU foam, (c) XRD pattern of unused and reused HBI-30, (b) FEG-SEM image of reused HBI-30, (c) EDAX analysis of HBI@PU, and (d) simultaneous degradation of phenolic compounds.
