# Supplementary material for: An LED-driven Hematite/Bi 4 O 5 I 2 nanocomposite as an S-scheme heterojunction photocatalyst for efficient degradation of phenolic compounds in real wastewater
Source: Royal Society of Chemistry journal article supplement (doi:10.1039/d4ta07324j), 2024-11-26
Supplement: d4ta07324j1.pdf [file d4ta07324j1.pdf]

1 **Supplementary information**

2 **LED-driven Hematite/Bi<sub>4</sub>O<sub>5</sub>I<sub>2</sub> nanocomposite as S-scheme heterojunction photocatalyst for**  
3 **efficient degradation of phenolic compounds in real wastewater**

4 *Akash Rawat*<sup>a</sup>, *Suneel Kumar Srivastava*<sup>b,δ</sup>, *Chandra Sekhar Tiwary*<sup>c</sup>,

5 *Ashok Kumar Gupta*<sup>d,\*</sup>

6 <sup>a</sup> School of Environmental Science and Engineering, Indian Institute of Technology

7 Kharagpur, Kharagpur 721302, India

8 <sup>b</sup> Department of Chemistry, Indian Institute of Technology Kharagpur,

9 Kharagpur 721302, India

10 <sup>c</sup> Metallurgical and Materials Engineering, Indian Institute of Technology Kharagpur,

11 Kharagpur 721302, India

12 <sup>d</sup> Environmental Engineering Division, Department of Civil Engineering, Indian Institute of

13 Technology Kharagpur, Kharagpur 721302, India

14 \* Corresponding author

15 E-mail address: [agupta@civil.iitkgp.ac.in](mailto:agupta@civil.iitkgp.ac.in)

16

17

18

19

20

<sup>δ</sup> Former faculty member of the Department of Chemistry, Indian Institute of Technology Kharagpur, Kharagpur 721302, India

## 21 **S1. Materials and chemical reagents**

22 For synthesis of photocatalyst: Hematite ore (acquired from the Department of Mining, IIT  
23 Kharagpur) Bismuth (III) nitrate pentahydrate ( $\text{Bi}(\text{NO}_3)_3 \cdot 5\text{H}_2\text{O}$ ;  $\geq 99\%$  purity), Potassium iodide  
24 (KI;  $\geq 99\%$  purity), Ethylene glycol ( $\text{C}_2\text{H}_6\text{O}_2$ ;  $\geq 99\%$  purity), Sodium hydroxide (NaOH;  $\geq 99\%$   
25 purity, Hydrochloric acid (HCl; 35%), Ethanol ( $\text{C}_2\text{H}_5\text{OH}$ ;  $\geq 99.9\%$ ). For the study of the influence  
26 of co-existing anions: Sodium chloride (NaCl;  $\geq 99.5\%$  purity), Sodium carbonate ( $\text{Na}_2\text{CO}_3$ ;  $\geq$   
27  $99.5\%$  purity), Sodium dihydrogen phosphate ( $\text{NaH}_2\text{PO}_4$ ;  $\geq 99.99\%$  purity), Sodium bicarbonate  
28 ( $\text{NaHCO}_3$ ;  $\geq 99.5\%$  purity), Sodium nitrate ( $\text{NaNO}_3$ ;  $\geq 99.9\%$ ), and Sodium sulphate anhydrous  
29 ( $\text{Na}_2\text{SO}_4$ ;  $\geq 99\%$  purity). For radical scavenging studies: Ascorbic acid ( $\text{C}_6\text{H}_8\text{O}_6$ ;  $\geq 99.9\%$ ), Silver  
30 nitrate ( $\text{AgNO}_3$ ), and 2-propanol ( $\text{C}_3\text{H}_8\text{O}$ ;  $\geq 99.99\%$  purity). For immobilization: Polyvinyl alcohol  
31 (PVA). \*Phenolic compounds used in this study: Bisphenol A ( $((\text{CH}_3)_2\text{C}(\text{C}_6\text{H}_4\text{OH}))_2$ ;  $\geq 99\%$  purity),  
32 m-cresol ( $\text{C}_7\text{H}_8\text{O}$ ;  $\geq 99\%$  purity), phenol ( $\text{C}_6\text{H}_5\text{OH}$ ;  $\geq 99\%$  purity). All of the chemicals were used  
33 in analytical grade without further purification and purchased from Merck India.

### 34 \*Preparation of stock solution

35 0.1 g of Phenolic compound (BPA or m-cresol A or Phenol) was dissolved in 1000 mL DI water  
36 and stirred until completely dissolved. After that, the prepared stock solution of 100 mg/L was  
37 kept in the dark ambiance at  $-4^\circ\text{C}$  and diluted according to the experimental requirements.

## 38 **S2. Characterization techniques**

39 The samples' surface morphology was analyzed using high-resolution (FEG-SEM) on Zeis Merlin  
40 Gemini II at an accelerating voltage of 20 kV. The structure and composition of the material were  
41 examined using 200 kV high-resolution transmission electron microscopy (HR-TEM) on Talos  
42 F200X G2, Thermo Scientific. The XRD patterns of each synthesized material were recorded using

43 a Malvern PANalytical X'Pert Powder diffractometer with Cu K $\alpha$  radiation ( $\lambda = 0.154$  nm) at a  
44 scanning rate of  $5^\circ 2\theta$  per minute. The 3D profile, topographical, and textural features, including  
45 roughness parameters (as per ISO 25178), were obtained from atomic force microscopy (AFM)  
46 images recorded using an Agilent 5500 atomic force microscope. The XPS of the material,  
47 indicating the available orbital states, was recorded using a PHI 5000 VersaProbe III (ULVAC  
48 PHI, Physical Electronics, USA) equipped with a monochromatic Al K $\alpha$  X-ray source and a  
49 focused beam adjustable from  $<10$   $\mu\text{m}$  to  $300$   $\mu\text{m}$  for rapid X-ray-induced secondary electron  
50 imaging (SXI). The system includes a  $180^\circ$  hemispherical electron energy analyzer with a 128-  
51 channel detector, an argon ion gun (0-5V) for specimen cleaning, depth profiling, and charge  
52 neutralization, and a Gas Cluster Ion Beam (GCIB) (2.5-20 kV Ar) for low-damage surface  
53 cleaning. Sample heating and cooling capabilities range from  $800$   $^\circ\text{C}$  to  $-140$   $^\circ\text{C}$ . The work function  
54 of each material was determined using ultraviolet photoelectric spectroscopy (UPS) and recorded  
55 on PHI 5000 VERSA PROBE III (energy source He I). The Brunauer-Emmett-Teller (BET)  
56 specific surface area, Barrett-Joyner-Halenda (BJH) pore volume, and nominal pore size were  
57 measured using nitrogen adsorption-desorption on an Autosorb iQ Station 1. Prior to analysis, the  
58 samples were degassed at  $200$   $^\circ\text{C}$  under vacuum conditions. Photoluminescence PL spectra were  
59 obtained from F-4600 fluorescence with an excitation wavelength of  $320$  nm. UV-visible diffuse  
60 reflectance spectroscopy (UV-DRS) was performed from  $300$  to  $800$  nm using a Cary 5000 UV-  
61 Vis-NIR spectrophotometer equipped with an integrating sphere of diameter  $150$  mm, and band  
62 gap energies were determined by drawing a Tau plot. The Zeta potential of the nanocomposite was  
63 analyzed by ZS90 (Malvern Nano Zetasizer). The leaching of Fe and Bi ions was measured by  
64 multi-elemental scans using ICP-MS (iCAP PRO, Thermo Scientific, USA). The intermediates of  
65 phenolic compounds after certain intervals were identified by LC-MS/MS (WATERS 2695, USA)

### 66 **S3. Experimental setup and procedure**

67 A lab-scale photocatalytic reactor was developed by integrating several components, including a  
68 visible lamp (Lumina 50 Watts LED, 6500 K cool daylight with a luminous flux of 105 lm/w), a  
69 magnetic stirrer (Tarsons digital spinnot) with a bead, glass beakers with capacities of 200 mL and  
70 1000 mL, and a box.<sup>1</sup> A white LED light was held 10 cm above the inner beaker of the jacketed  
71 beakers. The inner chamber contained the reaction suspension, while the outer beaker facilitated  
72 water circulation to provide cooling, maintaining the suspension's temperature at  $25 \pm 5$  °C. For  
73 the immobilized photocatalyst experiments, however, all tests were conducted in a 100 mL beaker  
74 without any cooling provisions.

75 The concentrations of phenolic compounds in suspension were analyzed using HPLC (Thermo  
76 Fisher Scientific, Ultimate 3000). A reverse phase C18 column measuring 4.6 cm × 250 mm was  
77 employed. The mobile phase consisted of a mixture of acetonitrile and deionized water in a 60:40  
78 (V/V) ratio, with a detection wavelength set at 270 nm. The flow rate was kept constant at 1  
79 mL/min, allowing for the detection of BPA, m-cresol, and phenol at retention times of 4.0, 4.53,  
80 and 5.2 minutes, respectively. Furthermore, the degradation efficiency and apparent rate constant  
81 was measured using the procedure given in our previous study.<sup>1</sup>

### 82 **S4. Procedure for antibacterial assay**

83 The toxicity assessment of the as-synthesized HBI-30 nanocomposite was conducted using the  
84 agar well diffusion test. The same procedure was followed as outlined in the study of <sup>1-4</sup>. Briefly,  
85 the investigations used pure strains of water pollution bioindicator *Escherichia coli* (ATCC 8739).  
86 After sterilization, nutritional agar was cooled on a flat surface. Fresh overnight *E. coli* cultures  
87 were evenly dispersed using a sterile cotton swab after agar plate solidification. Agar in each Petri  
88 plate was 6 mm thick. After that, three wells (~6 mm dia.) were cut from the agar plate. The first

89 well had 20  $\mu\text{L}$  of Levofloxacin (positive control), the second well had 20  $\mu\text{L}$  of DI (negative  
90 control), and the other wells housed 0.5 g/L HBI-30 nanocomposite solutions. After 10 min of  
91 diffusion, the agar plate was incubated at 35  $^{\circ}\text{C}$  for 24 h, and the zone of inhibition around the well  
92 was determined.

93 A conventional plate count test utilizing CFU count was performed to evaluate the toxicity of  
94 aqueous BPA before and after photocatalytic treatment. The sample included 10 mg/L BPA, 5  
95 mg/L m-cresol and 5 mg/L phenol. Nutrient agar was prepared (suspend 28 grams in 1000 mL DI  
96 water and heat to boiling to dissolve the medium completely) and sterilized (autoclaving at 15 lbs  
97 pressure and 121  $^{\circ}\text{C}$  for 15 minutes), then 0.1 mL of the E. coli solution was spread on a Petri dish  
98 using the spread plate method. The CFU was counted after incubating the Petri plate at 35  $^{\circ}\text{C}$  for  
99 24-48 h. This approach reveals PCs's potential toxicity and microbiological responses to it.

## 100 **S5. Topographical features of HBI-30 nanocomposite**

101 Table S1 presents the AFM surface roughness parameters, emphasizing the variations among the  
102 catalysts (Hematite,  $\text{Bi}_4\text{O}_5\text{I}_2$ , pristine HBI-30, and reused HBI-30). The low Sq value (0.645 nm),  
103 combined with the high Ssk (29.9) and Sku (1456) of Hematite, indicates a surface that is relatively  
104 smooth, which may limit photocatalytic activity.<sup>5</sup> In contrast,  $\text{Bi}_4\text{O}_5\text{I}_2$  exhibits a higher value of sq  
105 (6.84 nm), suggesting rough surface characteristics that may enhance photocatalysis by offering a  
106 more active site.<sup>1</sup> The pristine HBI-30 nanocomposite heterojunction showcased a stable surface  
107 profile of 5.97 nm Sq, with notably reduced Ssk (7.79) and Sku (90.2), implying a smoother and  
108 more homogeneous surface that is advantageous for electron-hole separation. Furthermore, the  
109 HBI-30 photocatalyst, which was reused 10 times, demonstrated an increase in surface roughness  
110 with a Sq of 10.7 nm, suggesting agglomeration or degradation. Nevertheless, reused HBI-30  
111 preserved Ssk (10.3) and Sku (142) values, indicating a stable surface that makes it acceptable for

112 extended photocatalytic uses regardless of minor changes in roughness parameters. The findings  
113 align with the BET analysis and are clearly illustrated in Fig. S3a-c.

#### 114 **S6. Photocatalytic degradation of *m*-cresol and phenol**

115 Fig. S8a shows the photodegradation of *m*-cresol at varying initial concentrations (1–50 mg/L)  
116 while keeping other parameters constant ( HBI-30 dose = 0.5 g/L, pH = 6.75, and irradiation time  
117 = 80 min). Up to 20 mg/L *m*-cresol, the degradation efficiency reached 100% but decreased to  
118 around 71% at 50 mg/L concentration. Similarly, for phenol, 100% degradation was observed at 1  
119 mg/L concentration, which subsequently decreased to 35% at 50 mg/L (Fig. S8b).

#### 120 **S7. Source and characteristics of various water matrices**

121 To examine the simultaneous photodegradation of PCs in different real water matrices, the water  
122 samples were collected from the following sources: tap water - School Environmental Science  
123 and Engineering, IIT Kharagpur (India), pond water - pond located in IIT Kharagpur campus  
124 (India), river water - Tangsawati river, West Bengal (India), and secondary treatment effluent -  
125 Sewage treatment plant, IIT Kharagpur (India). The characteristics of real water matrices are listed  
126 in Table S1.

127

128

129

130

131

132 Table S1. Surface roughness parameters for Hematite, Bi<sub>4</sub>O<sub>5</sub>I<sub>2</sub>, HBI-30 (pristine), and HBI-30  
 133 (reused).

| <b>Parameters*</b>                            | <b>Root mean square height</b> | <b>Skewness</b> | <b>Kurtosis</b> | <b>Maximum peak height</b> | <b>Maximum pit height</b> | <b>Maximum height</b> | <b>Arithmetic mean height</b> |
|-----------------------------------------------|--------------------------------|-----------------|-----------------|----------------------------|---------------------------|-----------------------|-------------------------------|
| <b>Catalyst</b>                               | <b>(Sq, nm)</b>                | <b>(Ssk)</b>    | <b>(Sku)</b>    | <b>(Sp, nm)</b>            | <b>(Sv, nm)</b>           | <b>(Sz, nm)</b>       | <b>(Sa, nm)</b>               |
| $\alpha$ -Fe <sub>2</sub> O <sub>3</sub>      | 0.645                          | 29.9            | 1465            | 51.1                       | 4.50                      | 55.6                  | 0.231                         |
| Bi <sub>4</sub> O <sub>5</sub> I <sub>2</sub> | 6.84                           | 18.5            | 435             | 243                        | 21.7                      | 265                   | 1.16                          |
| HBI-30 (Pristine)                             | 5.97                           | 7.79            | 90.2            | 121                        | 72                        | 193                   | 1.88                          |
| HBI-30 (reused)                               | 10.7                           | 10.3            | 142             | 241                        | 40.6                      | 282                   | 3.04                          |

134 \* Where, Sq signifies the standard deviation of surface height variation, Ssk quantifies the asymmetry of the surface  
 135 profile, Kurtosis represents the sharpness of the surface peaks and valleys, Sp denotes the height of the highest peak  
 136 from the mean plane of the surface, Sv indicates the deepest valley from the mean plane of the surface, Sz is the total  
 137 profile height (the sum of Sv and Sp), and Sa measures the average deviation of surface height from the mean plane,  
 138 commonly utilized to assess surface roughness

139

140 Table S2. BET and BJH results of Hematite, Bi<sub>4</sub>O<sub>5</sub>I<sub>2</sub>, and HBI-30.

| <b>Catalyst</b>                                 | <b>SSA</b><br><b>(m<sup>2</sup>/g)</b> | <b>Pore volume</b><br><b>(cc/g)</b> | <b>Average pore</b><br><b>radius (Å)</b> |
|-------------------------------------------------|----------------------------------------|-------------------------------------|------------------------------------------|
| <b>Hematite</b>                                 | 18.73                                  | 0.01732                             | 18.50                                    |
| <b>Bi<sub>4</sub>O<sub>5</sub>I<sub>2</sub></b> | 43.43                                  | 0.02874                             | 20.25                                    |
| <b>HBI-30</b>                                   | 30.01                                  | 0.04031                             | 19.12                                    |

Table S3. Characteristics of various water matrices.

| <b>Parameters</b>                                                 | <b>DI water</b> | <b>Tap water</b> | <b>Pond</b> | <b>River water</b> | <b>Secondary treatment effluent</b> |
|-------------------------------------------------------------------|-----------------|------------------|-------------|--------------------|-------------------------------------|
| pH                                                                | 6.75 ± 0.15     | 7.2 ± 0.15       | 6.62 ± 0.15 | 6.55 ± 0.5         | 6.8 ± 0.2                           |
| Turbidity (NTU)                                                   | BDL             | 0.25 ± 0.1       | 11.5 ± 0.3  | 9.6 ± 0.3          | 40.8 ± 0.5                          |
| TSS (mg L <sup>-1</sup> )                                         | BDL             | 5 ± 0.4          | 35 ± 0.4    | 32.5 ± 0.5         | 31 ± 0.4                            |
| TDS (mg L <sup>-1</sup> )                                         | BDL             | 115 ± 5          | 178 ± 0.5   | 155 ± 0.5          | 305 ± 0.5                           |
| Chloride (Cl <sup>-</sup> , mg L <sup>-1</sup> )                  | BDL             | 11.5 ± 1         | 29.02 ± 0.6 | 7.8 ± 0.05         | 49.6 ± 0.6                          |
| Bicarbonate (HCO <sub>3</sub> <sup>-</sup> , mg L <sup>-1</sup> ) | BDL             | 21.2 ± 2         | 125 ± 1     | 145 ± 2            | 106 ± 0.2                           |
| Sulphahte (SO <sub>4</sub> <sup>2-</sup> , mg L <sup>-1</sup> )   | BDL             | 2.9 ± 1          | 25.2 ± 0.8  | 4.1 ± 1            | 2.6 ± 0.2                           |
| Nitrate (NO <sub>3</sub> <sup>-</sup> , mg L <sup>-1</sup> )      | BDL             | BDL              | 54.2 ± 0.9  | 3.11 ± 0.2         | 5.75 ± 0.2                          |
| COD (mg L <sup>-1</sup> )                                         | BDL             | BDL              | 112 ± 0.12  | 62.5 ± 2           | 40 ± 2                              |



Table S4. Degradation products formed and identified in LC-MS/MS.

| Sr. No. | Degradation product | Compound           | M/Z | Structure                                                                             | Ref. |
|---------|---------------------|--------------------|-----|---------------------------------------------------------------------------------------|------|
| I       |                     | BPA                | 228 | 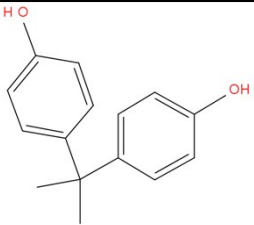   | 1,6  |
| II      |                     | m-cresol           | 109 |    | 7,8  |
| III     |                     | Phenol             | 94  |   | 9,10 |
| 1.      | A                   | 5-Hydroxybisphenol | 244 |  | 1,11 |

---

2. A1

257

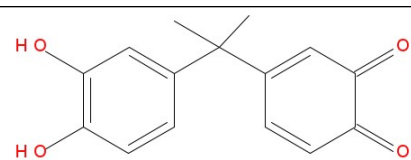

1,12,13

3. A2

242

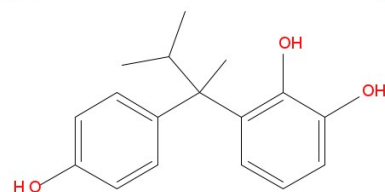

1,11

4. A3

260

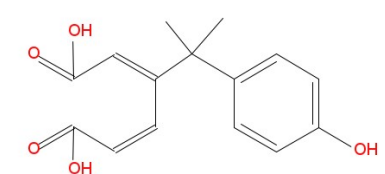

1,14

5. A4

257

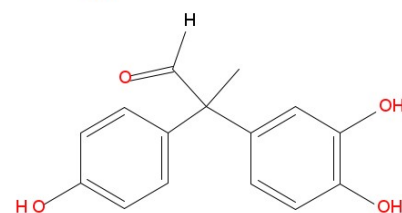

1,12,14,15

6. A5

168

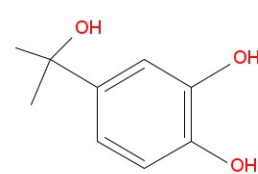

1,14

7. A6

217

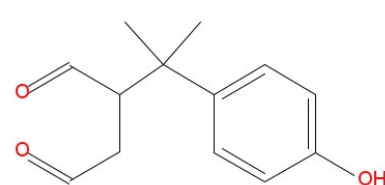

1,14

---

|     |    |                                                                |     |                                                                                       |           |
|-----|----|----------------------------------------------------------------|-----|---------------------------------------------------------------------------------------|-----------|
| 8.  | A7 |                                                                | 261 | 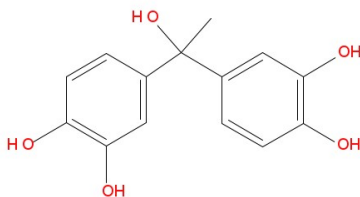   | 1,15,16   |
| 9.  | B  | 2-methoxybenzene-1,4-diol                                      | 141 |    | 17        |
| 10. | B1 | Benzene-1,4-diol or p-Dihydroxybenzene (Hydroquinone) (C6H6O2) | 110 |    | 6,9,14,17 |
| 11. | C  | 4,4'-(1-Methyl-1,2-ethenediyl)bis[phenol ]                     | 226 |   | 1         |
| 12. | C1 |                                                                | 154 |  | 17,18     |

|     |    |                                                  |     |                                                                                      |            |
|-----|----|--------------------------------------------------|-----|--------------------------------------------------------------------------------------|------------|
| 13. | C2 | 4-(Prop-1-en-2-yl)phenol                         | 134 | 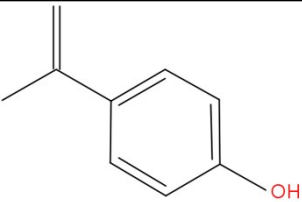  | 1,11,14,15 |
| 14. | C3 | 4-Hydroxyacetophenone                            | 136 |   | 1,11       |
| 15. | C4 | (4-(prop-1-en-2-yl)cyclohexa-3,5-diene-1,2-dione | 147 |   | 1,16       |
| 16. | C5 | Maleic Acid                                      | 116 |  | 1          |

---

17. D

4-Benzylphenol

199

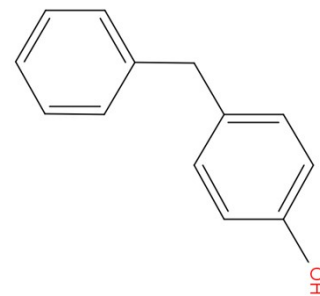

1,12

18. D1

p-Hydroxybenzaldehyde

122

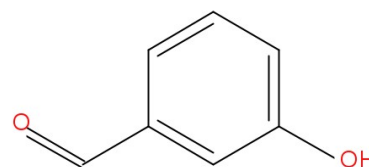

1,12

19. D2

3,4-Dihydroxybenzoic acid

153

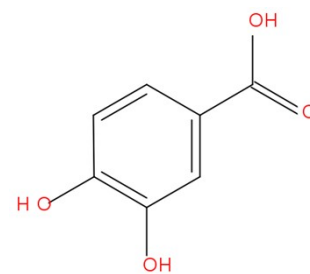

1,6,12

20. E

241

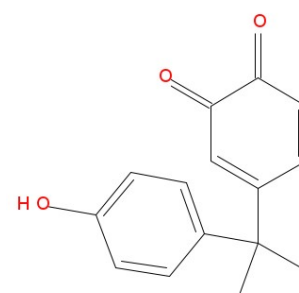

1,12

---

---

|     |   |                                 |     |  |    |
|-----|---|---------------------------------|-----|--|----|
| 21. | F | 2-Phenoxy-cyclohexa-2,5-dienone | 186 |  | 10 |
|-----|---|---------------------------------|-----|--|----|

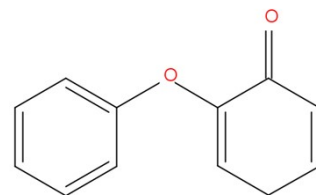

|     |   |                      |     |  |    |
|-----|---|----------------------|-----|--|----|
| 22. | G | [1,1'-Biphenyl]-4-ol | 171 |  | 10 |
|-----|---|----------------------|-----|--|----|

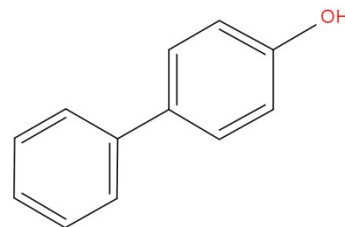

|     |   |                                                                               |     |  |   |
|-----|---|-------------------------------------------------------------------------------|-----|--|---|
| 23. | H | o-Dihydroxybenzene (Catechol) (C <sub>6</sub> H <sub>6</sub> O <sub>2</sub> ) | 110 |  | 9 |
|-----|---|-------------------------------------------------------------------------------|-----|--|---|

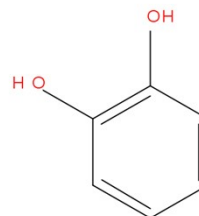

|     |   |                                                              |     |  |   |
|-----|---|--------------------------------------------------------------|-----|--|---|
| 24. | I | Benzoquinone (C <sub>6</sub> H <sub>4</sub> O <sub>2</sub> ) | 108 |  | 9 |
|-----|---|--------------------------------------------------------------|-----|--|---|

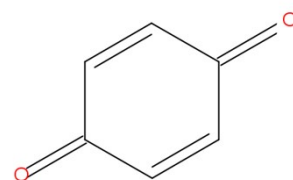

|     |   |                         |     |  |   |
|-----|---|-------------------------|-----|--|---|
| 25. | J | [1,1'-Biphenyl]-4,4'-ol | 186 |  | 9 |
|-----|---|-------------------------|-----|--|---|

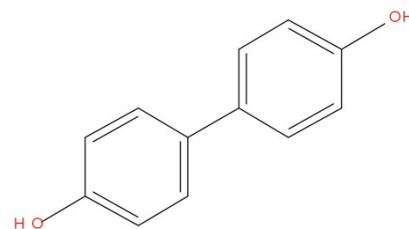

|     |     |                                |     |                                                                                       |    |
|-----|-----|--------------------------------|-----|---------------------------------------------------------------------------------------|----|
| 26. | K   | Hydroxyl-<br>hydroquinone      | 126 | 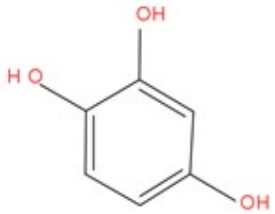   | 10 |
| 27. | K1  | Hydroxyl-<br>benzoquinone<br>" | 124 |    | 10 |
| 28. | L   | 3-<br>Hydroxybenzaldehyd<br>e  | 122 |    | 19 |
| 29. | M1a | 2-Methylbenzene-1,4-<br>diol   | 124 |   | 7  |
| 30. | M1b | 3-Methylbenzene-1,2-<br>diol   | 124 |  | 7  |

|     |     |                           |     |                                                                                       |      |
|-----|-----|---------------------------|-----|---------------------------------------------------------------------------------------|------|
| 31. | M1c | 4-Methylbenzene-1,2-diol  | 124 | 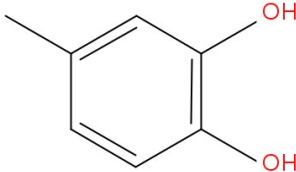   | 7    |
| 32. | M2  | 2-Methyl-p-benzoquinone   | 110 |    | 8    |
| 33. | L1  | 2,5-Dihydroxybenzaldehyde | 138 |    | 6,19 |
| 34. | Z1  | 2-Butanol                 | 75  |    | 1    |
| 35. | Z2  | Acrolein                  | 56  |  | 10   |
| 36. | Z3  | Glycerol                  | 92  |  | 6,10 |
| 37. | Z4  | Heptanoic acid            | 127 |  | 1    |



|     |    |                 |     |                                                                                       |         |
|-----|----|-----------------|-----|---------------------------------------------------------------------------------------|---------|
| 38. | Z5 | Oxalic acid     | 90  | 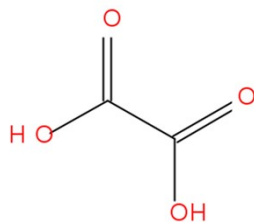   | 6,8     |
| 39. | Z6 | Acetic acid     | 61  |    | 1       |
| 40. | Z7 | Fumaric acid    | 116 |    | 8,11,14 |
| 41. | Z8 | Ethylene glycol | 62  |   | 1,6     |
| 42. | Z9 | Glycolic acid   | 77  |  | 1,14    |

Table S5. Comparison of optimized Hematite/Bi<sub>4</sub>O<sub>5</sub>I<sub>2</sub> heterojunction nanocomposite with the existing heterojunction materials.

| Heterojunction Catalysts                                                                                    | Synthesis method             | Light source  | Catalyst dosage (g/L) | Phenolic compounds concentration (mg/L) | Degradation (%) / time (min) |
|-------------------------------------------------------------------------------------------------------------|------------------------------|---------------|-----------------------|-----------------------------------------|------------------------------|
| Bi <sub>7</sub> O <sub>9</sub> I <sub>3</sub> -Bi <sub>4</sub> O <sub>5</sub> Br <sub>2</sub> <sup>20</sup> | Microwave oven               | 50 W LED lamp | 0.1                   | BPA = 10                                | 97.5/180                     |
| BiOCl/ZnCrZr-LBMO <sup>21</sup>                                                                             | One-pot solvothermal         | 300 W Xe lamp | 0.5                   | BPA = 10                                | 94.2/60                      |
| Bi <sub>4</sub> O <sub>5</sub> Br <sub>2</sub> /α-MnS <sup>22</sup>                                         | Ball-milling processes       | 300 W Xe lamp | 0.5                   | BPA = 20                                | 78/180                       |
| BiOI/ZnO <sup>23</sup>                                                                                      | Solvothermal                 | 300 W Xe lamp | 0.2                   | BPA = 10                                | 95/120                       |
| BiOI/Zn <sub>2</sub> SnO <sub>4</sub> <sup>24</sup>                                                         | Oil bath                     | 300 W Xe lamp | 1.0                   | BPA = 20                                | 99/180                       |
| g-C <sub>3</sub> N <sub>4</sub> /BiOI <sup>25</sup>                                                         | Solvothermal                 | 50 W LED lamp | 1.0                   | BPA = 20                                | 90/120                       |
| β-CD/riboflavin @Bi <sub>2</sub> WO <sub>6</sub> <sup>26</sup>                                              | Hydrothermal                 | 10 W Xe lamp  | 0.2                   | BPA = 10                                | 95/40                        |
| InVO <sub>4</sub> /Bi <sub>5</sub> O <sub>7</sub> I <sup>27</sup>                                           | Hydrothermal and calcination | 24 W LED lamp | 0.04                  | BPA = 20                                | 93.0/90                      |
| Co-W <sub>18</sub> O <sub>49</sub> /PDI <sup>28</sup>                                                       | Chemical precipitation       | 250 W Xe lamp | 0.5                   | BPA = 10                                | 91.2/150                     |

|                                                                                                 |                               |                 |            |                      |                 |
|-------------------------------------------------------------------------------------------------|-------------------------------|-----------------|------------|----------------------|-----------------|
| AgBr/Ag/Bi <sub>5</sub> O <sub>7</sub> I <sup>29</sup>                                          | Hydrothermal                  | 500 W Xe lamp   | 0.4        | BPA = 20             | 63/120          |
| Bi <sub>4</sub> O <sub>5</sub> I <sub>2</sub> /Fe <sub>3</sub> O <sub>4</sub> <sup>30</sup>     | Solvothermal                  | 300 W Xe lamp   | 0.5        | BPA = 20             | 89/80           |
| Fe <sub>3</sub> O <sub>4</sub> /BiOI <sup>31</sup>                                              | Chemical precipitation        | 800W Xe lamp    | 1.0        | BPA = 20             | 100/90          |
| α-MnO <sub>2</sub> /Bi <sub>7</sub> O <sub>9</sub> I <sub>3</sub> <sup>1</sup>                  | Chemical precipitation        | 50 W LED lamp   | 0.5        | BPA = 20             | 97.5/80         |
| V <sub>2</sub> C/Bi <sub>2</sub> WO <sub>6</sub> <sup>32</sup>                                  | Hydrothermal                  | 500 W Xe lamp   | 0.4        | Phenol = 10          | 77.2/120        |
| C@BiOBr <sup>33</sup>                                                                           | Solvothermal                  | 300 W Xe lamp   | 1.0        | Phenol = 50          | 97/90           |
| Bi <sub>4</sub> O <sub>7</sub> /AgBiO <sub>3</sub> <sup>34</sup>                                | Hydrothermal                  | 300 W Xe lamp   | 0.5        | Phenol = 20          | 74.87/120       |
| Bi <sub>4</sub> O <sub>5</sub> I <sub>2</sub> /BiOCl <sup>35</sup>                              | Hydrothermal                  | 300 W Xe lamp   | 0.5        | Phenol = 10          | 100/180         |
| Co–Pd/BiVO <sub>4</sub> <sup>36</sup>                                                           | Hydrothermal                  | 300 W Xe lamp   | 0.8        | Phenol = 20          | 90/180          |
| Bi/COF <sup>37</sup>                                                                            | Solvothermal                  | 300 W Xe lamp   | 1.0        | Phenol = 20          | 99/70           |
| N–Bi <sub>2</sub> O <sub>2</sub> CO <sub>3</sub> /g-C <sub>3</sub> N <sub>4</sub> <sup>38</sup> | Hydrothermal                  | 300 W Xe lamp   | 1.0        | m-cresol = 25        | 97.29/180       |
| <b>Hematite/Bi<sub>4</sub>O<sub>5</sub>I<sub>2</sub></b>                                        |                               | <b>50 W LED</b> |            | <b>BPA = 20</b>      | <b>100/80</b>   |
| <b>(This work)</b>                                                                              | <b>Chemical precipitation</b> | <b>lamp</b>     | <b>0.5</b> | <b>m-cresol = 20</b> | <b>100/80</b>   |
|                                                                                                 |                               |                 |            | <b>Phenol = 20</b>   | <b>52.36/80</b> |

---



## Reference:

- 1 A. Rawat, S. K. Srivastava, C. S. Tiwary and A. K. Gupta, *J. Environ. Chem. Eng.*, 2024, **12**, 112879.
- 2 V. K. Parida, S. K. Srivastava, S. Chowdhury and A. K. Gupta, *Chem. Eng. J.*, 2023, **472**, 144969.
- 3 A. Majumder, A. Kumar, P. Sarathi and M. Varma, *J. Environ. Chem. Eng.*, 2021, **9**, 104812.
- 4 A. Majumder, A. K. Gupta and M. Sillanpää, *Colloids Surfaces A Physicochem. Eng. Asp.*, 2022, **648**, 129250.
- 5 Y. Zhang, E. K. Stefanakos and D. Yogi Goswami, *Build. Environ.*, 2013, **61**, 188–196.
- 6 Y. Chu, B. Miao, X. Zheng and H. Su, *Sep. Purif. Technol.*, 2021, **272**, 118866.
- 7 E. Zarei, *Int. J. Ind. Chem.*, 2018, **9**, 285–294.
- 8 Y. Chu, D. Zhang, L. Liu, Y. Qian and L. Li, *J. Hazard. Mater.*, 2013, **252–253**, 306–312.
- 9 L. Liu, H. Liu, Y.-P. Zhao, Y. Wang, Y. Duan, G. Gao, M. Ge and W. Chen, *Environ. Sci. Technol.*, 2008, **42**, 2342–2348.
- 10 T. T. T. Dang, S. T. T. Le, D. Channei, W. Khanitchaidecha and A. Nakaruk, *Res. Chem. Intermed.*, 2016, **42**, 5961–5974.
- 11 S. Zhang, H. Lan, Y. Cui, X. An, H. Liu and J. Qu, *Environ. Sci. Technol.*, 2022, **56**, 3552–3563.
- 12 Q. Wang, Y. Cao, Y. Yu, C. Zhang, J. Huang, G. Liu, X. Zhang, Z. Wang, H. Ozgun, M. E. Ersahin and W. Wang, *Chemosphere*, 2022, **308**, 136276.
- 13 A. Mondal, S. Sarkar and U. G. Nair, *Water Sci. Technol.*, 2021, **83**, 322–330.

- 14 T. Ahamad, M. Naushad, Y. Alzharani and S. M. Alshehri, *J. Mol. Liq.*, 2020, **311**, 113339.
- 15 Y. Kanigaridou, A. Petala, Z. Frontistis, M. Antonopoulou, M. Solakidou, I. Konstantinou, Y. Deligiannakis, D. Mantzavinos and D. I. Kondarides, *Chem. Eng. J.*, 2017, **318**, 39–49.
- 16 X. Jiang, X. He, H. Huang, Y. Li, J. Yang, J. Mei and S. Cui, *J. Alloys Compd.*, 2023, **963**, 171221.
- 17 B. Kim, J. Jang and D. S. Lee, *Chemosphere*, 2022, **289**, 133040.
- 18 A. Garg, T. Singhanian, A. Singh, S. Sharma, S. Rani, A. Neogy, S. R. Yadav, V. K. Sangal and N. Garg, *Sci. Rep.*, 2019, **9**, 765.
- 19 Y. Abdollahi, A. Zakaria and N. A. Sairi, 2014, **42**, 1292–1297.
- 20 A. Chachvalvutikul, T. Luangwanta, B. Inceesungvorn and S. Kaowphong, *J. Colloid Interface Sci.*, 2023, **641**, 595–609.
- 21 Y. Chen, D. Zhu, S. Xue, H. Wang, Q. Lu, G. Ruan, C. Zhao and F. Du, *Appl. Surf. Sci.*, 2024, **653**, 159337.
- 22 F. Chang, S. Zhao, Y. Lei, S. Peng, D. Liu and Y. Kong, *Sep. Purif. Technol.*, 2023, **304**, 122324.
- 23 C. Zhang, W. Fei, H. Wang, N. Li, D. Chen, Q. Xu, H. Li, J. He and J. Lu, *J. Hazard. Mater.*, 2020, **399**, 123109.
- 24 T. Yan, H. Liu, M. Sun, X. Wang, M. Li, Q. Yan, W. Xu and B. Du, *RSC Adv.*, 2015, **5**, 10688–10696.
- 25 J. Zhang, J. Fu, Z. Wang, B. Cheng, K. Dai and W. Ho, *J. Alloys Compd.*, 2018, **766**, 841–850.

- 26 Q. Lu, L. Di, Y. Zhou and Y. Zhou, *Sep. Purif. Technol.*, 2025, **353**, 128099.
- 27 Y. Li, Y. Li, L. Huang, S. Liu, M. Zhu, L. Qiu, J. Huang, Y. Fu and L. Huang, *J. Colloid Interface Sci.*, 2025, **677**, 234–249.
- 28 J. Liu, X. Gao, R. Wang, S. Zhu, X. Zhu, X. Zhu, D. Li, Q. Ruan, M. Cheng, B. Wang, H. Li, H. Xu and P. K. Chu, *Colloids Surfaces A Physicochem. Eng. Asp.*, 2024, **703**, 135050.
- 29 H. Ding, Y. Guan, Z. Wang, Y. Yamauchi, Y. Asakura and Q. Han, *J. Alloys Compd.*, 2024, **1002**, 175215.
- 30 F. Chang, H. Chen, X. Zhang, B. Lei and X. Hu, *Sep. Purif. Technol.*, 2020, **238**, 116442.
- 31 S. Gao, C. Guo, J. Lv, Q. Wang, Y. Zhang, S. Hou, J. Gao and J. Xu, *Chem. Eng. J.*, 2017, **307**, 1055–1065.
- 32 K. Li, J. Zhu, W. Zhou, L. Sun and S. Tian, *Ceram. Int.*, 2024, **50**, 23694–23709.
- 33 Z. Han, Y.-G. Liu, R. Zhang, J. Shi, Y. Jia, X. Liu and H.-Y. Jiang, *Langmuir*, , DOI:10.1021/acs.langmuir.4c01829.
- 34 Z. Jia, J. Liu, R. Li, C. Fan and Y. Wang, *Mater. Sci. Semicond. Process.*, 2024, **177**, 108359.
- 35 Y. Zhong, C. Wu, D. Chen, J. Zhang, Y. Feng, K. Xu, W. Hao, H. Ding, G. Lv, Y. Du and L. Wang, *Appl. Catal. B Environ.*, 2023, **329**, 122554.
- 36 S. Wang, H. Luo, X. Xu, Y. Bai, X. Song, J. Zhang, J. Li, J. Zhao and C. Tang, *Surfaces and Interfaces*, 2016, **5**, 39–46.
- 37 S.-H. Ma, W.-L. Jin, W. Li, H.-Y. Wang, L.-N. Zhu, M. Zeng and D.-M. Kong, *ACS Appl. Nano Mater.*, 2023, **6**, 14151–14164.
- 38 Y. Huang, M. Li, X. Zhang, B. Xing, Y. Ye and Y. Zeng, *Environ. Res.*, 2024, **242**, 117771.

## Revised supplementary Figures

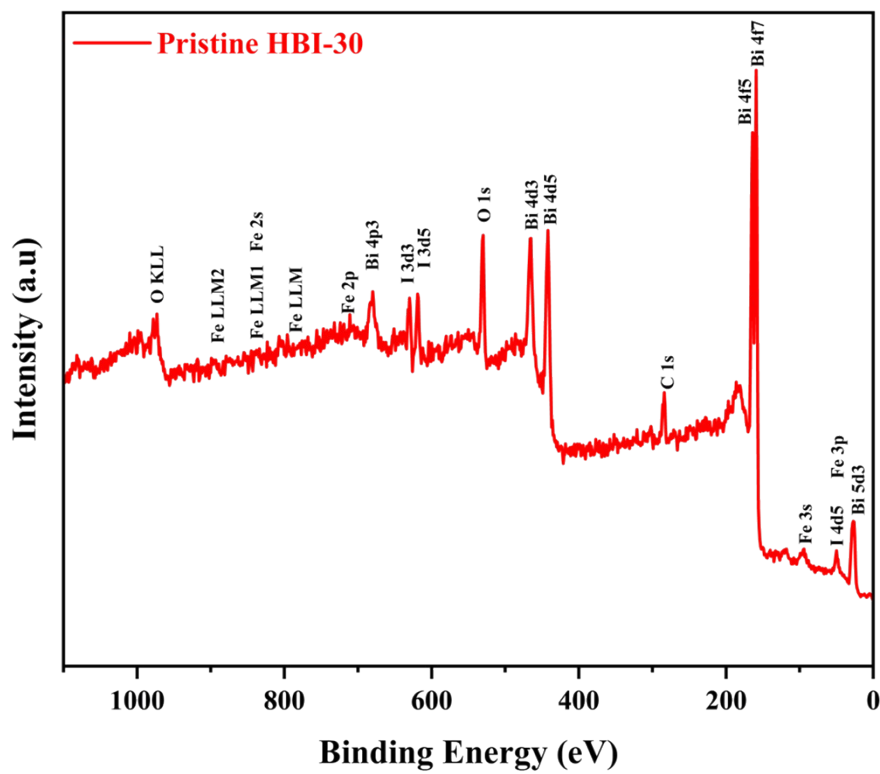

Fig. S1. XPS survey spectrum of HBI-30.



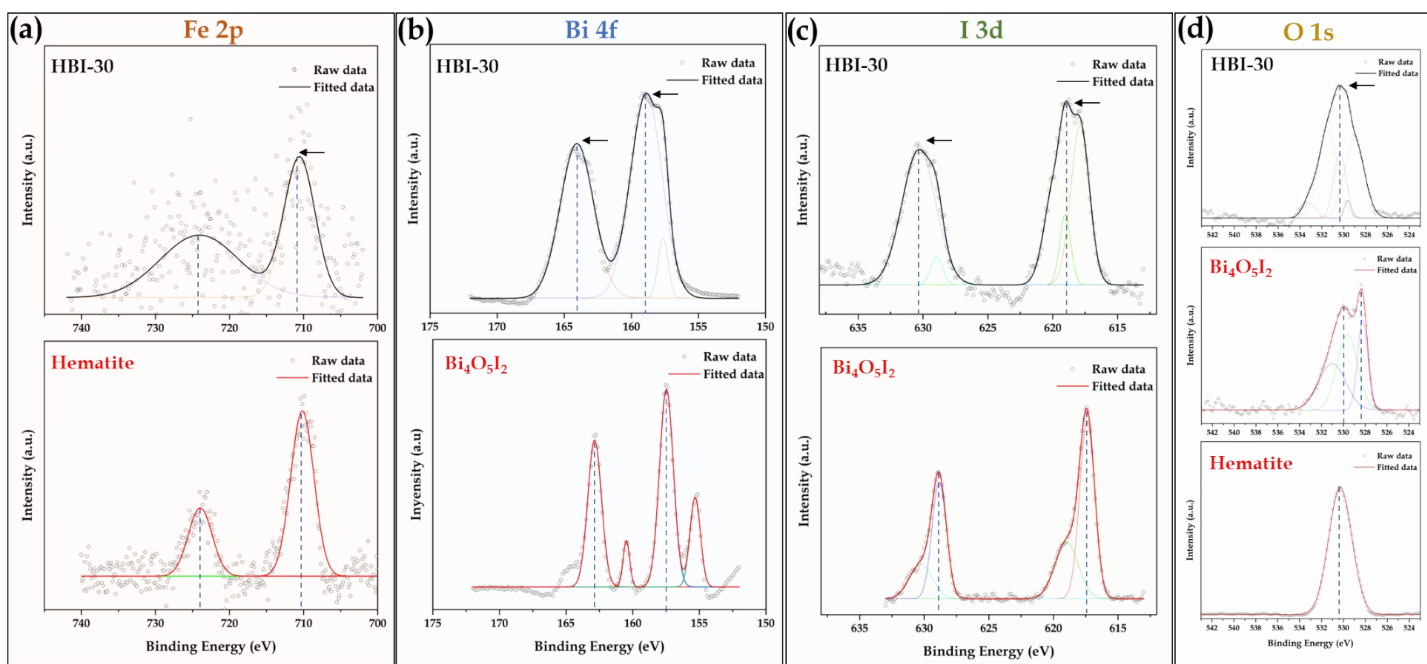

Fig. S2. XPS Comparison of pristine (Hematite and Bi<sub>4</sub>O<sub>5</sub>I<sub>2</sub>) with HBI-30 composite, (a) Fe 2p, (b) Bi 4f, (c) I 3d, and (d) O 1s.

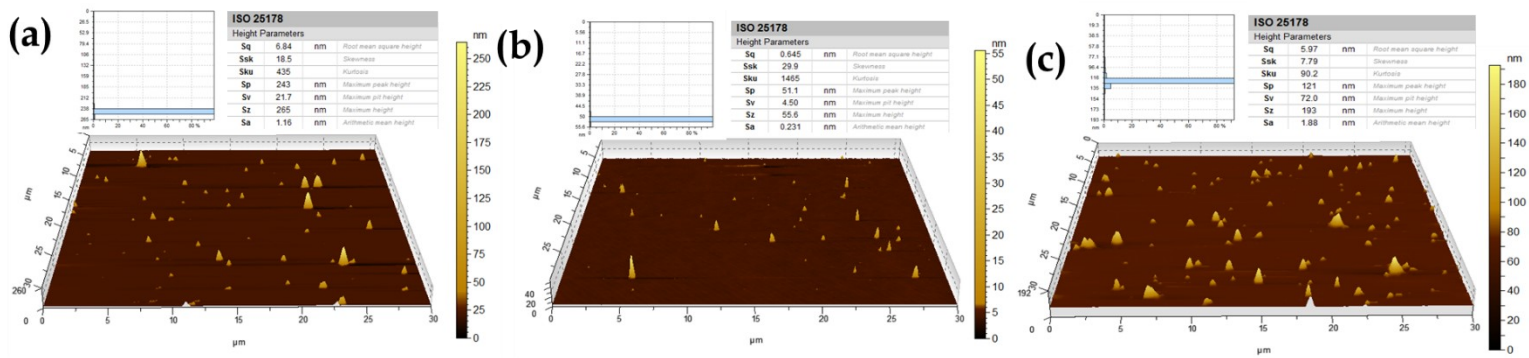

Fig. S3. AFM 3D topography of (a) hematite, Bi<sub>4</sub>O<sub>5</sub>I<sub>2</sub>, HBI and inset of each Fig. (a-c) histogram and height parameters of hematite, Bi<sub>4</sub>O<sub>5</sub>I<sub>2</sub>, and HBI-30.

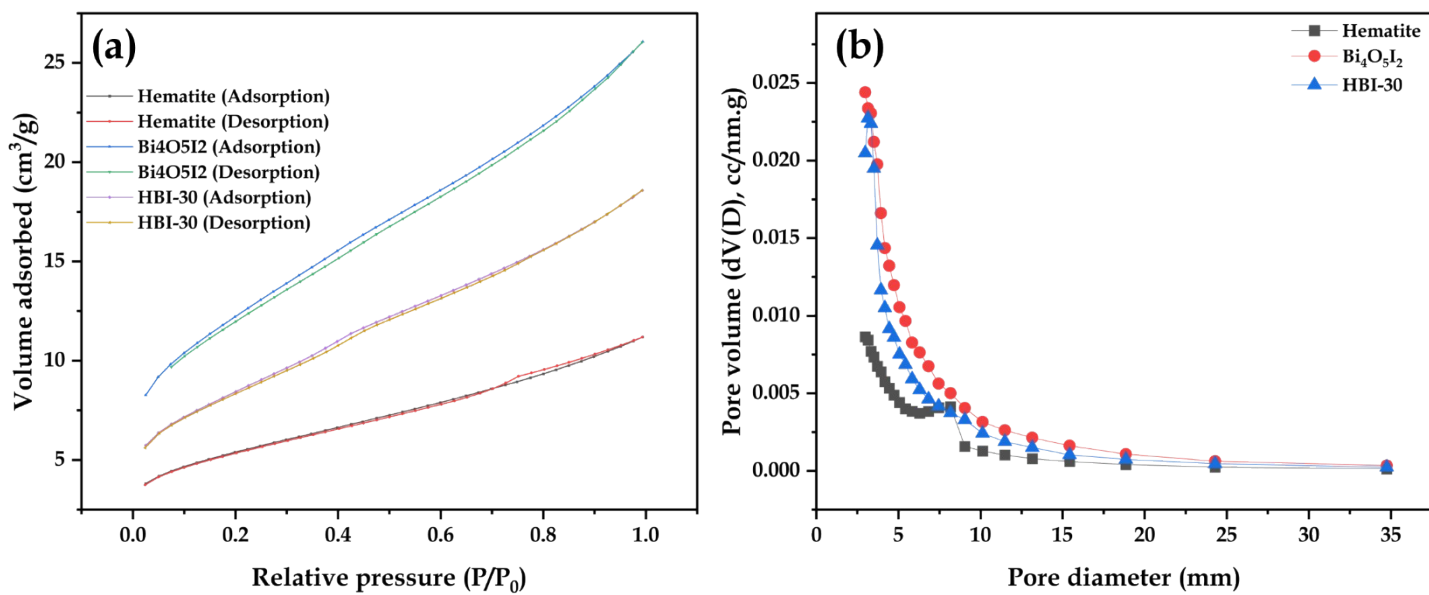

Fig. S4. (a)  $N_2$  adsorption/desorption isotherms, and (b) pore size distribution curves for Hematite,  $Bi_4O_5I_2$ , and HBI-30.

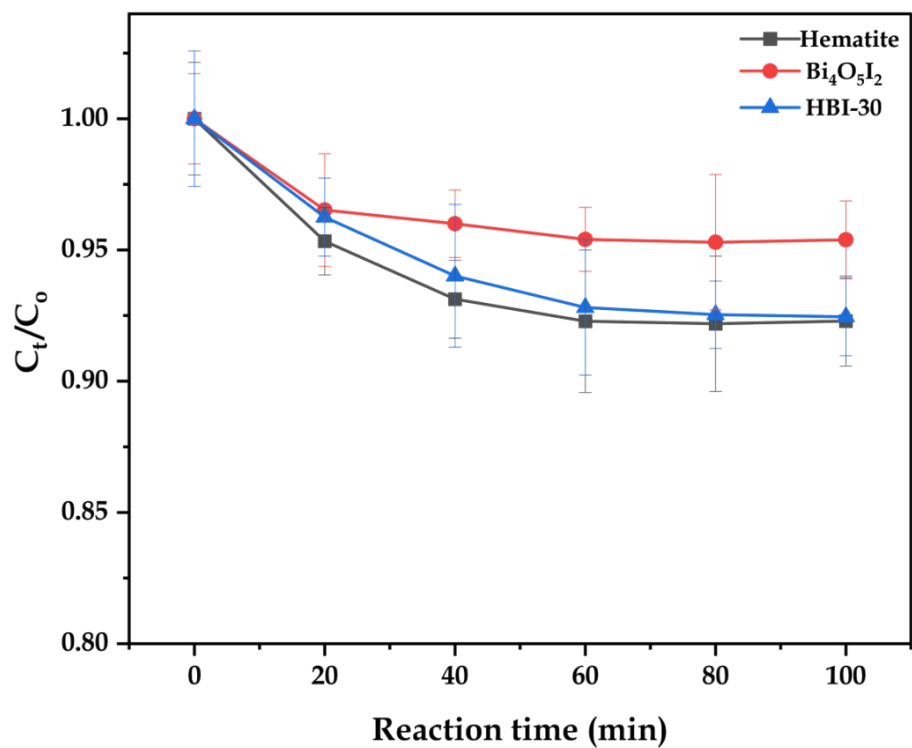

Fig. S5. (a) Adsorption/desorption of BPA (10 mg/L) on Hematite,  $\text{Bi}_4\text{O}_5\text{I}_2$ , and HBI-30.

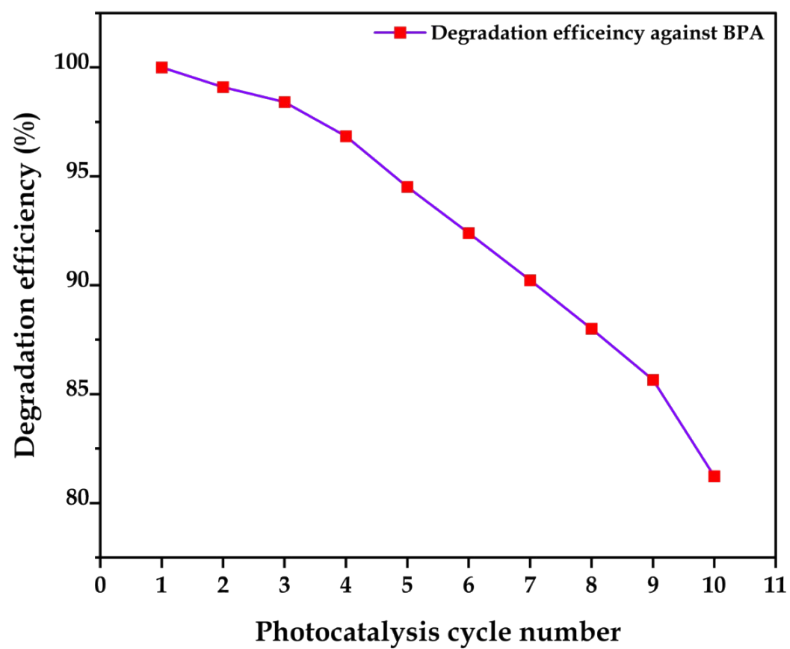

Fig. S6. Reusability test of HBI-30, up to ten cycles.

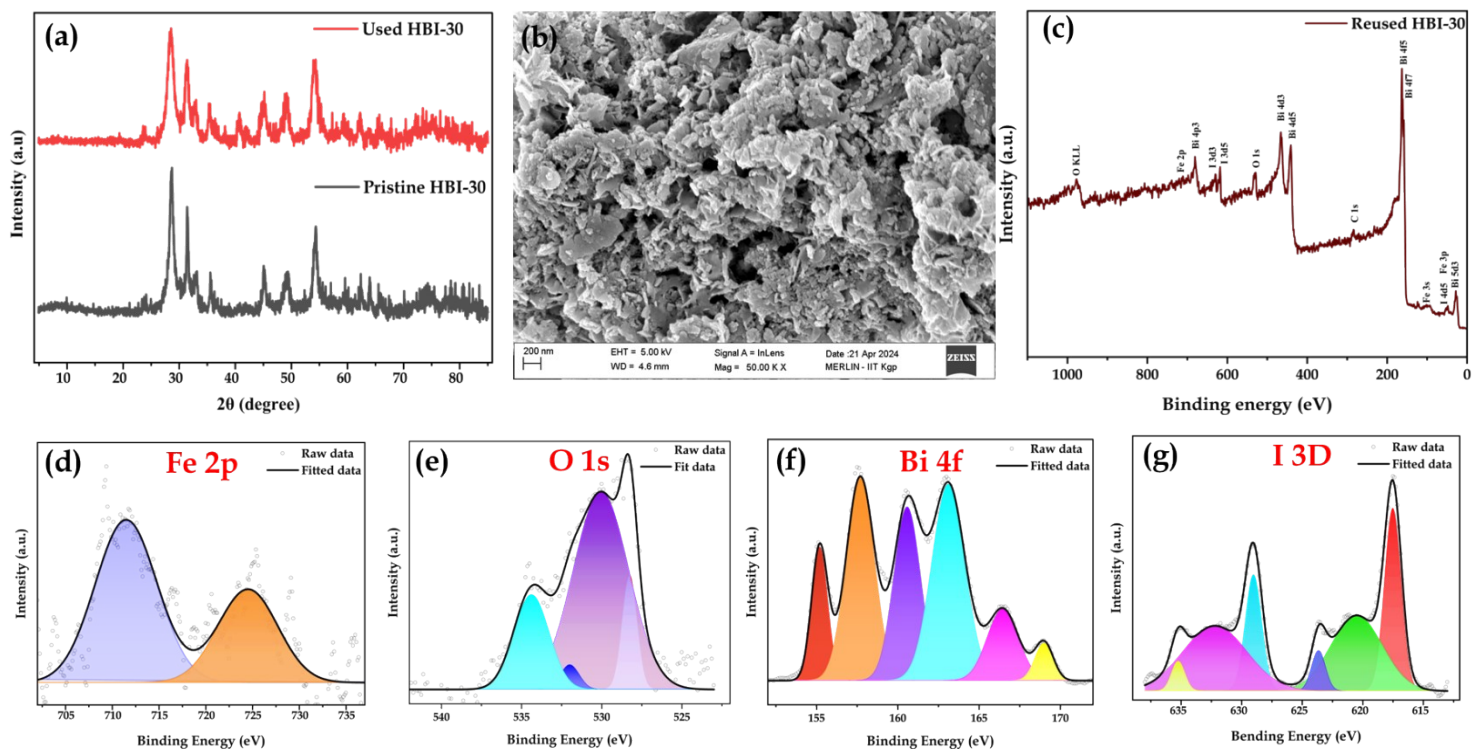

Fig. S7. (a) XRD pattern of unused and reused HBI-30, (b) FEG-SEM image and (c) XPS survey scan of reused HBI-30, and deconvoluted XPS spectra for (d) Fe 2p, (e) O 1s, (f) Bi 4f, and (g) I 3D.

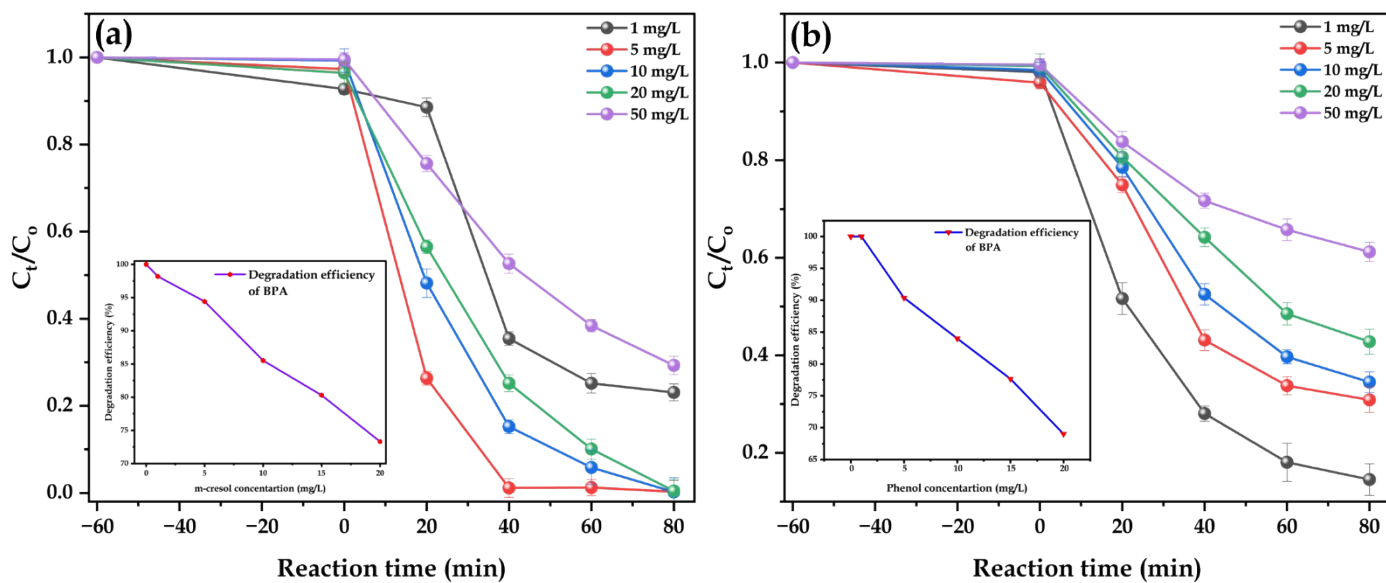

Fig. S8. Photocatalytic degradation of (a) m-cresol and (b) phenol, with insets showing the effect of their varying concentrations on BPA degradation efficiency.

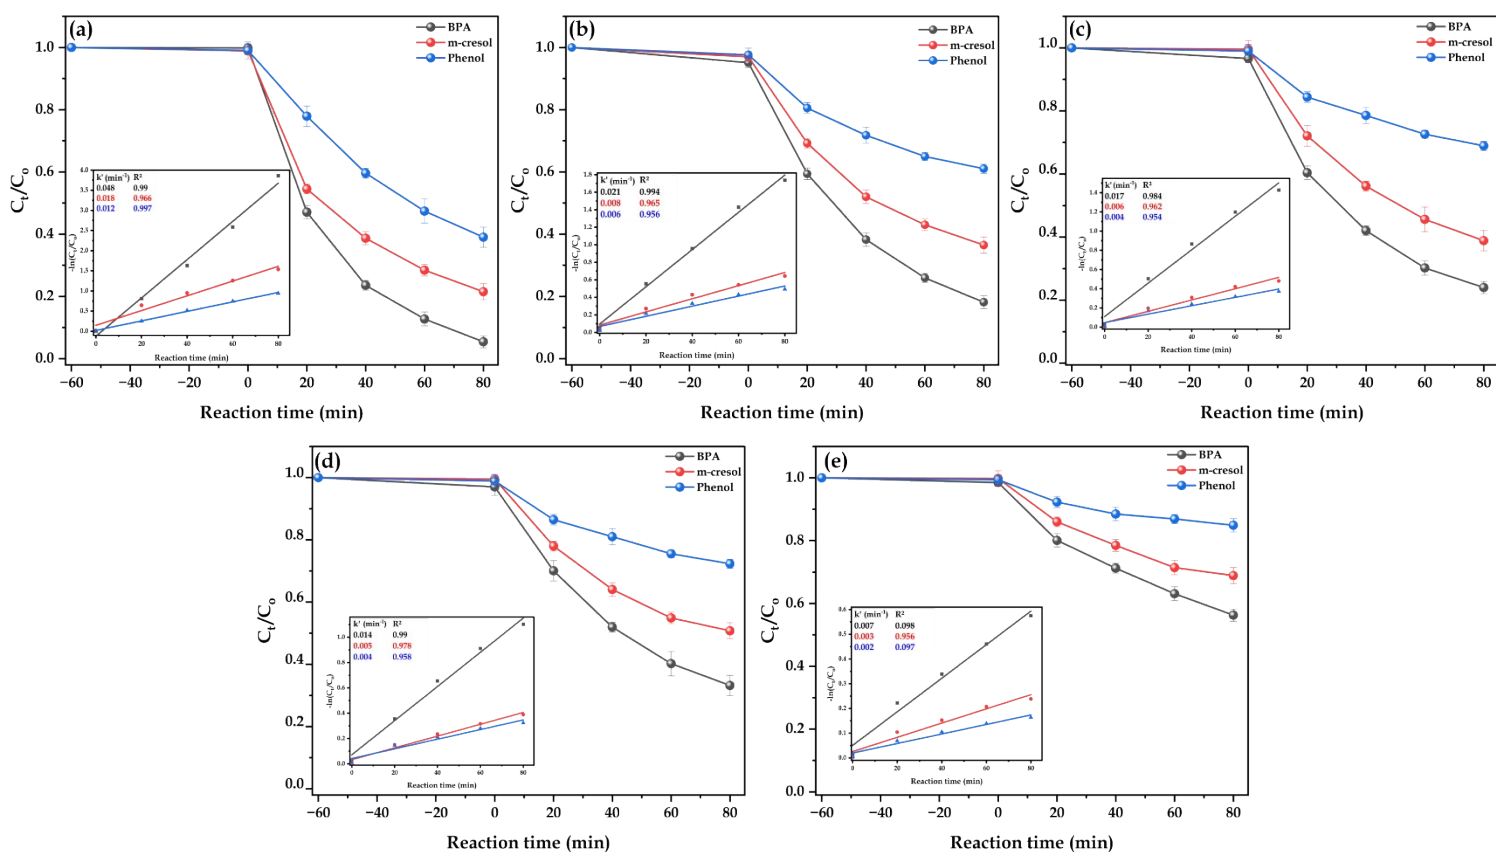

Fig. S9. Simultaneous degradation of phenolic compounds in different water matrices, (a) DI water, (b) tap water, (c) river water, (d) pond water, and (e) secondary effluent of the wastewater treatment plant, with inset of kinetic model for respective figures.



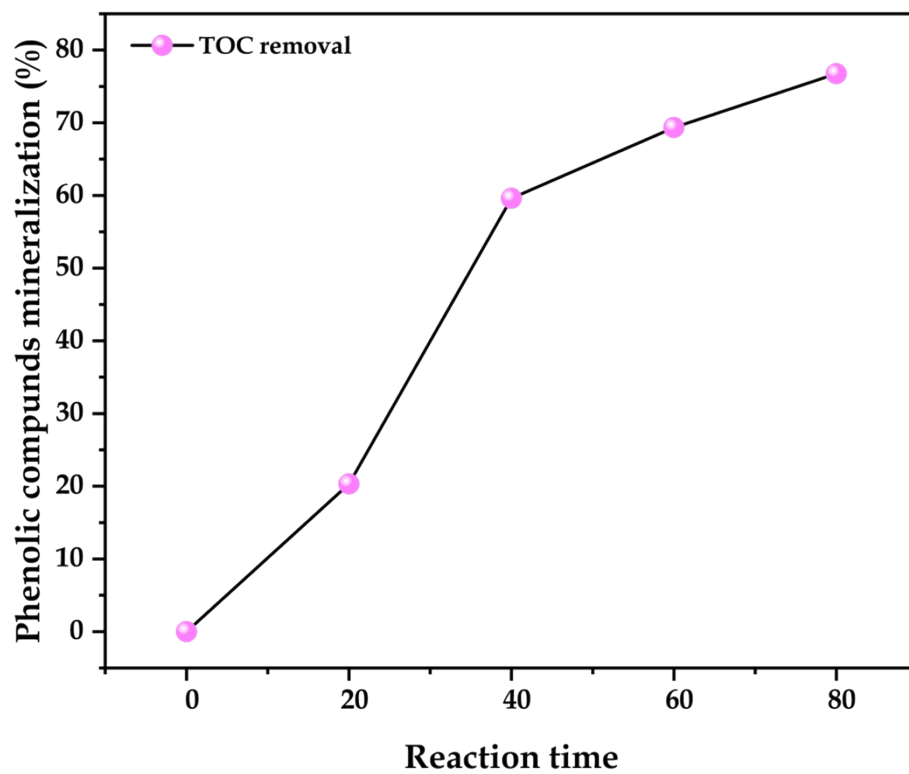

Fig. S10. TOC removal under operational parameters: initial concentration of BPA, m-cresol, and phenol is 10, 5, and 5,mg/L respectively; catalyst dose = 0.5 g/L; pH = 6.75.

(a)

CC1  
Scan\_13024\_0\_434 (7.328) Cn (Top2, H); Cm (424.441)

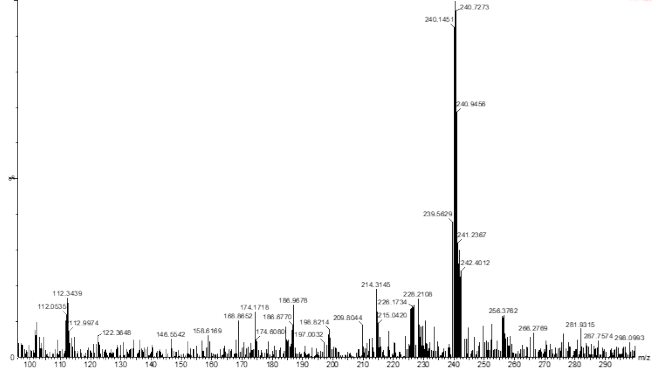

CC1  
Scan\_13024\_0\_478 (8.088) Cn (Top2, H); Cm (471.454)

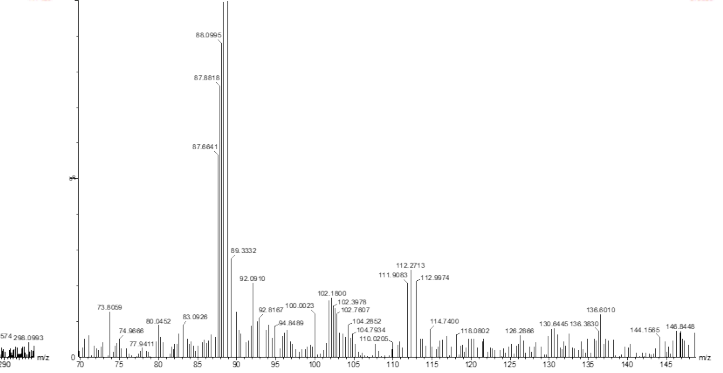

2: Scan ES-  
3.63e5

CC1  
Scan\_13024\_0\_155 (2.815) Cn (Top2, H); Cm (119.178)

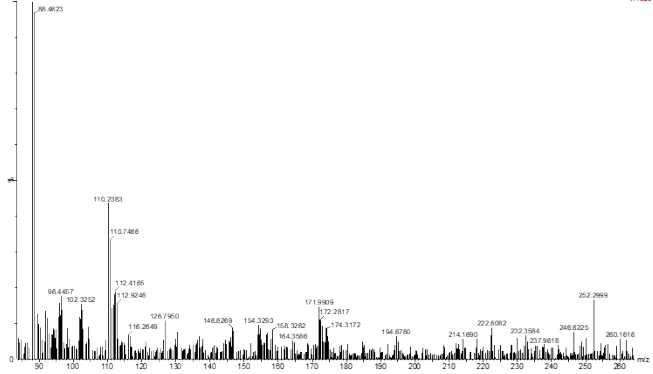

CC1  
Scan\_13024\_1\_388 (8.548) Cn (Top2, H); Cm (370.408)

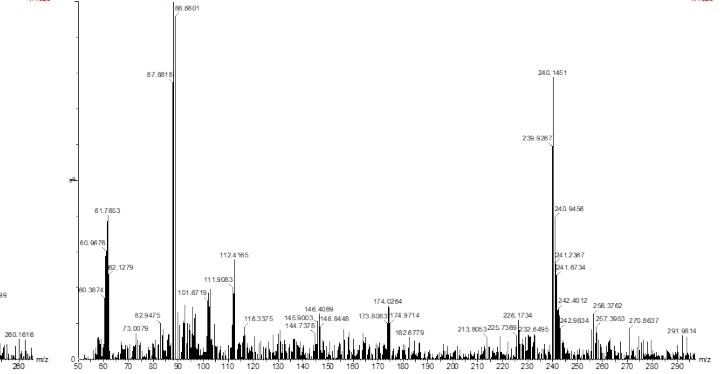

2: Scan ES-  
4.13e5

CC1  
Scan\_13024\_1\_388 (8.548) Cn (Top2, H); Cm (370.408)

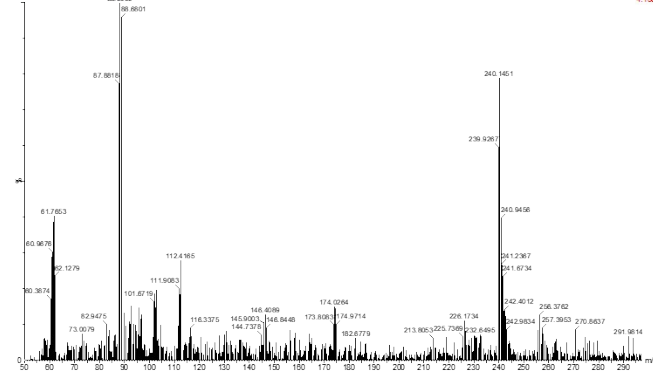

CC1  
Scan\_13024\_2\_254 (4.287) Cn (Top2, H); Cm (231.278)

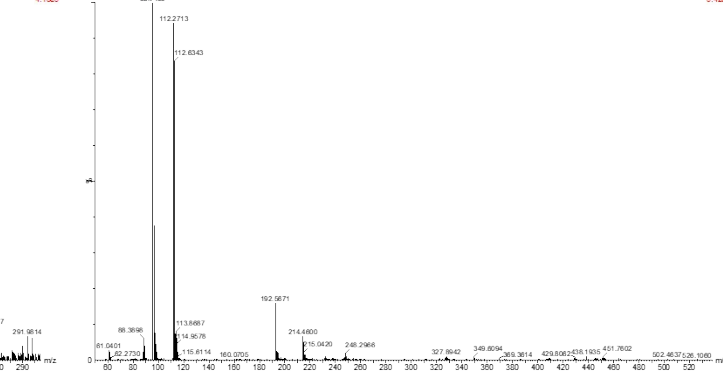

2: Scan ES-  
5.42e5

(b)

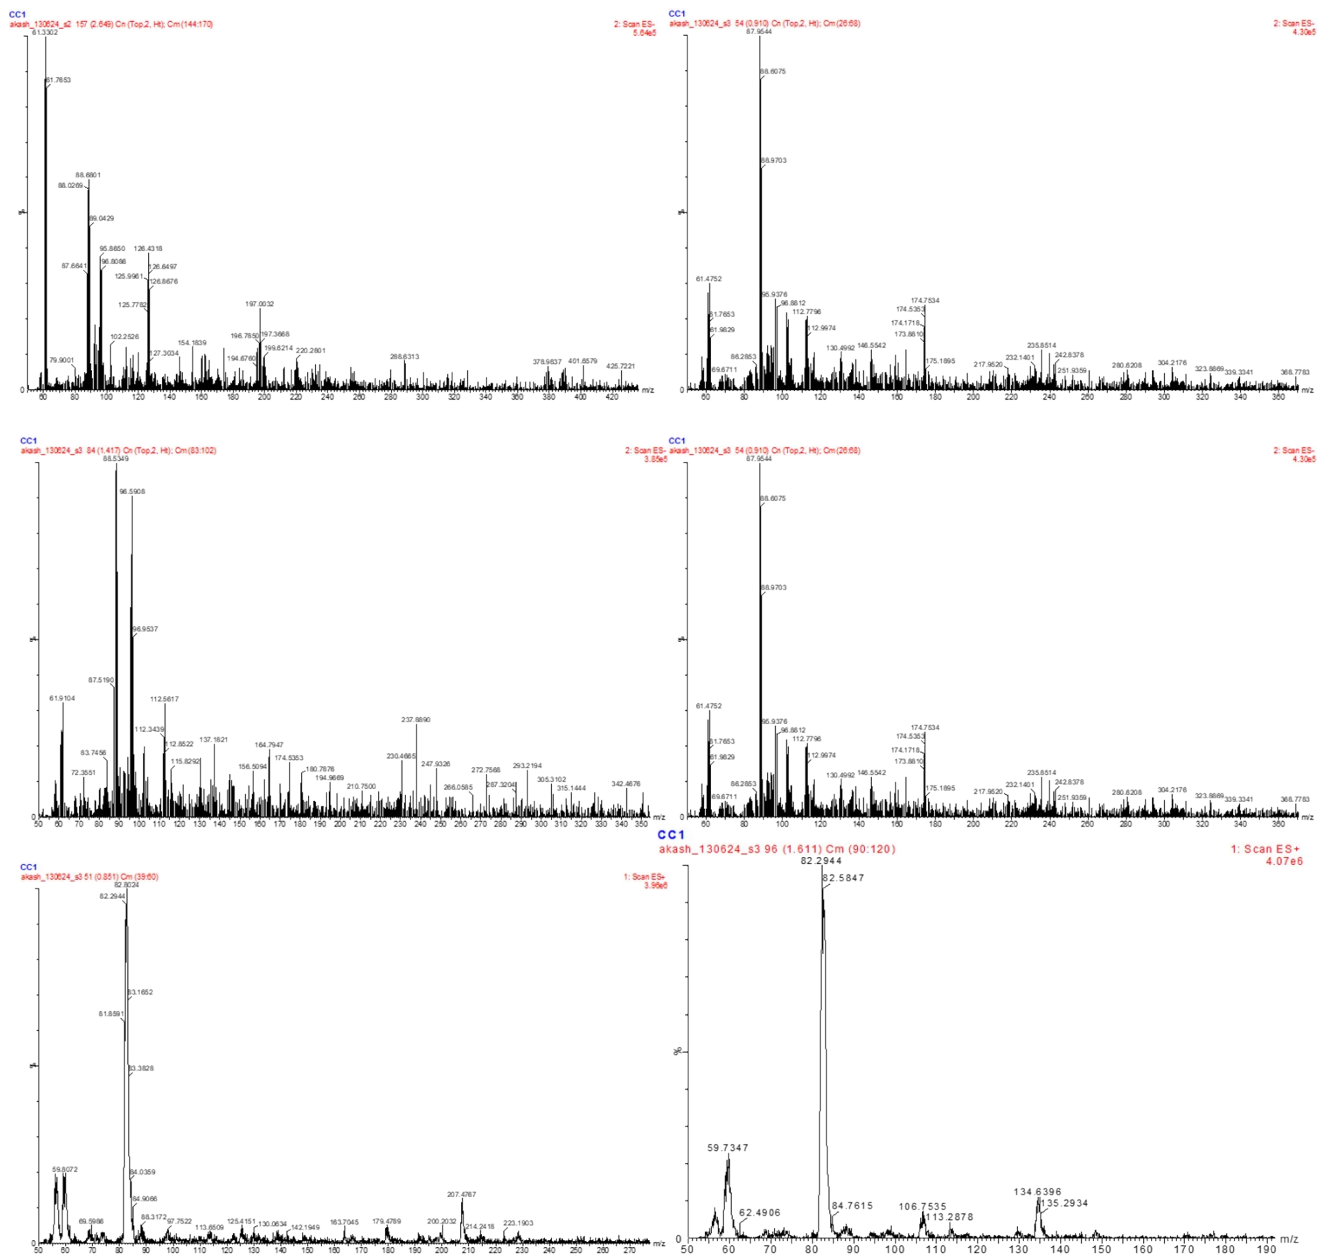

Fig. S11b. LC-MS/MS-identified peaks of degradation products after photocatalytic degradation of phenolic compounds (Part II/III).

(c)

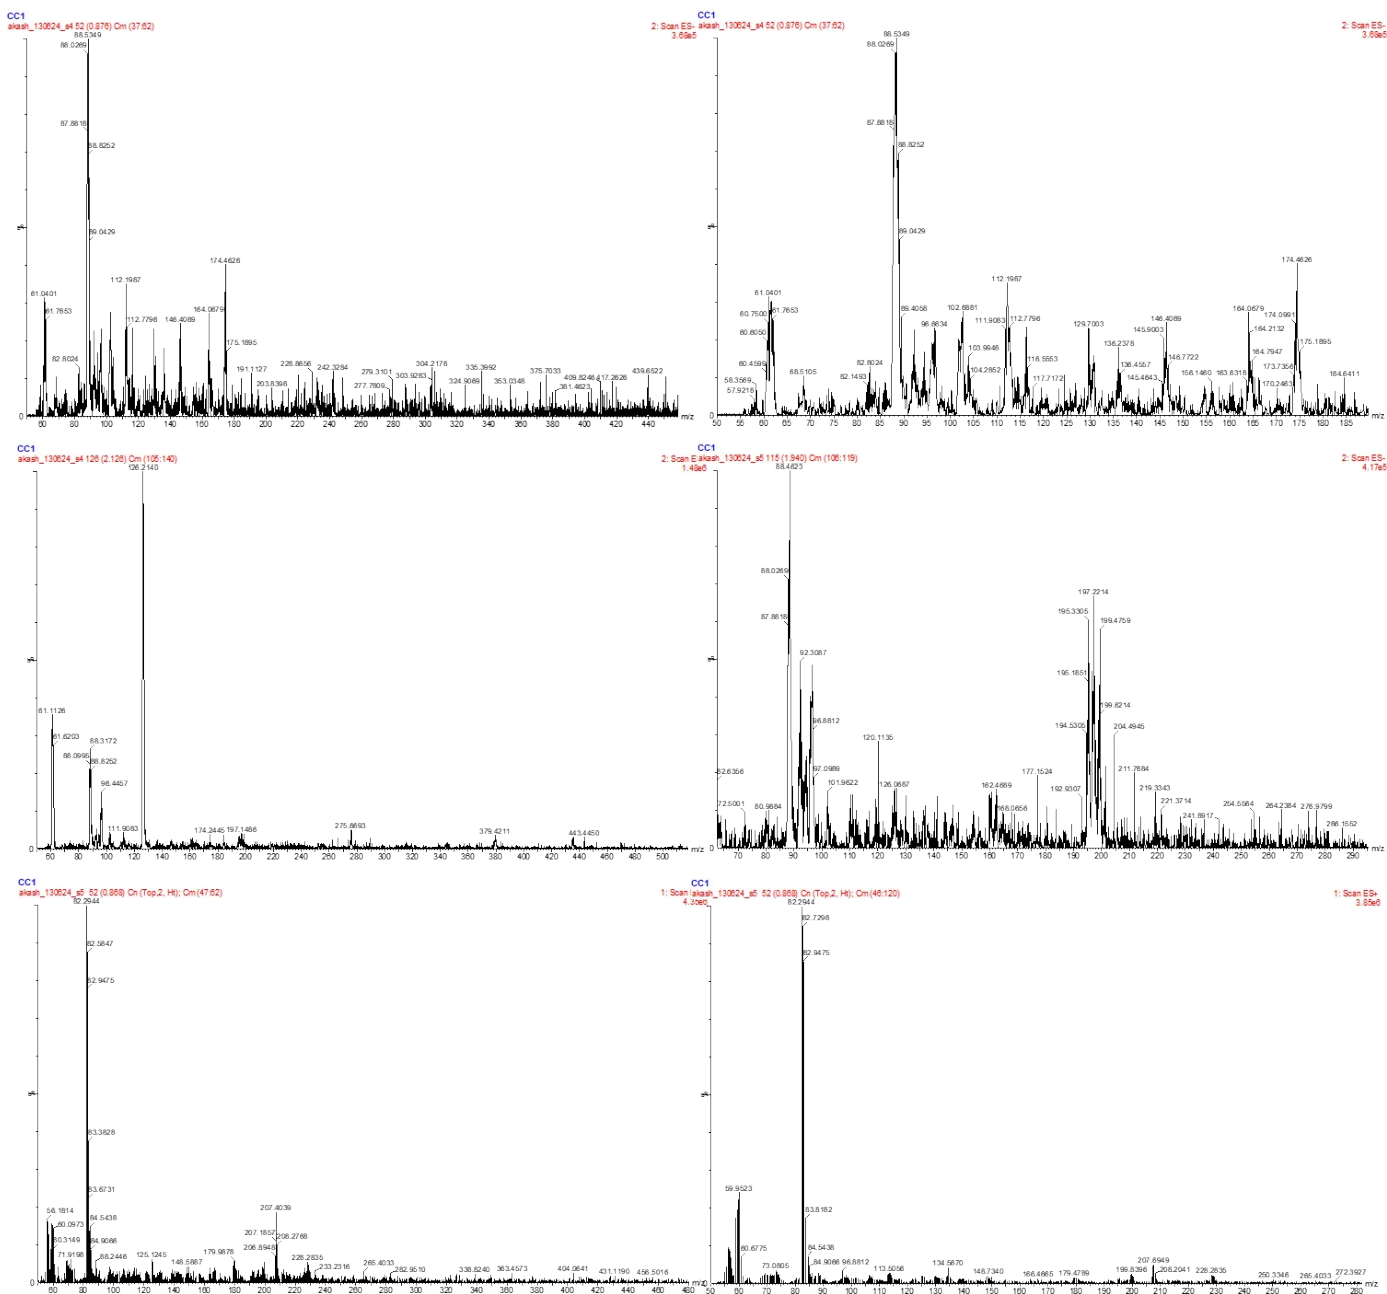

Fig. S11c. LC-MS/MS-identified peaks of degradation products after photocatalytic degradation of phenolic compounds (Part III/III).

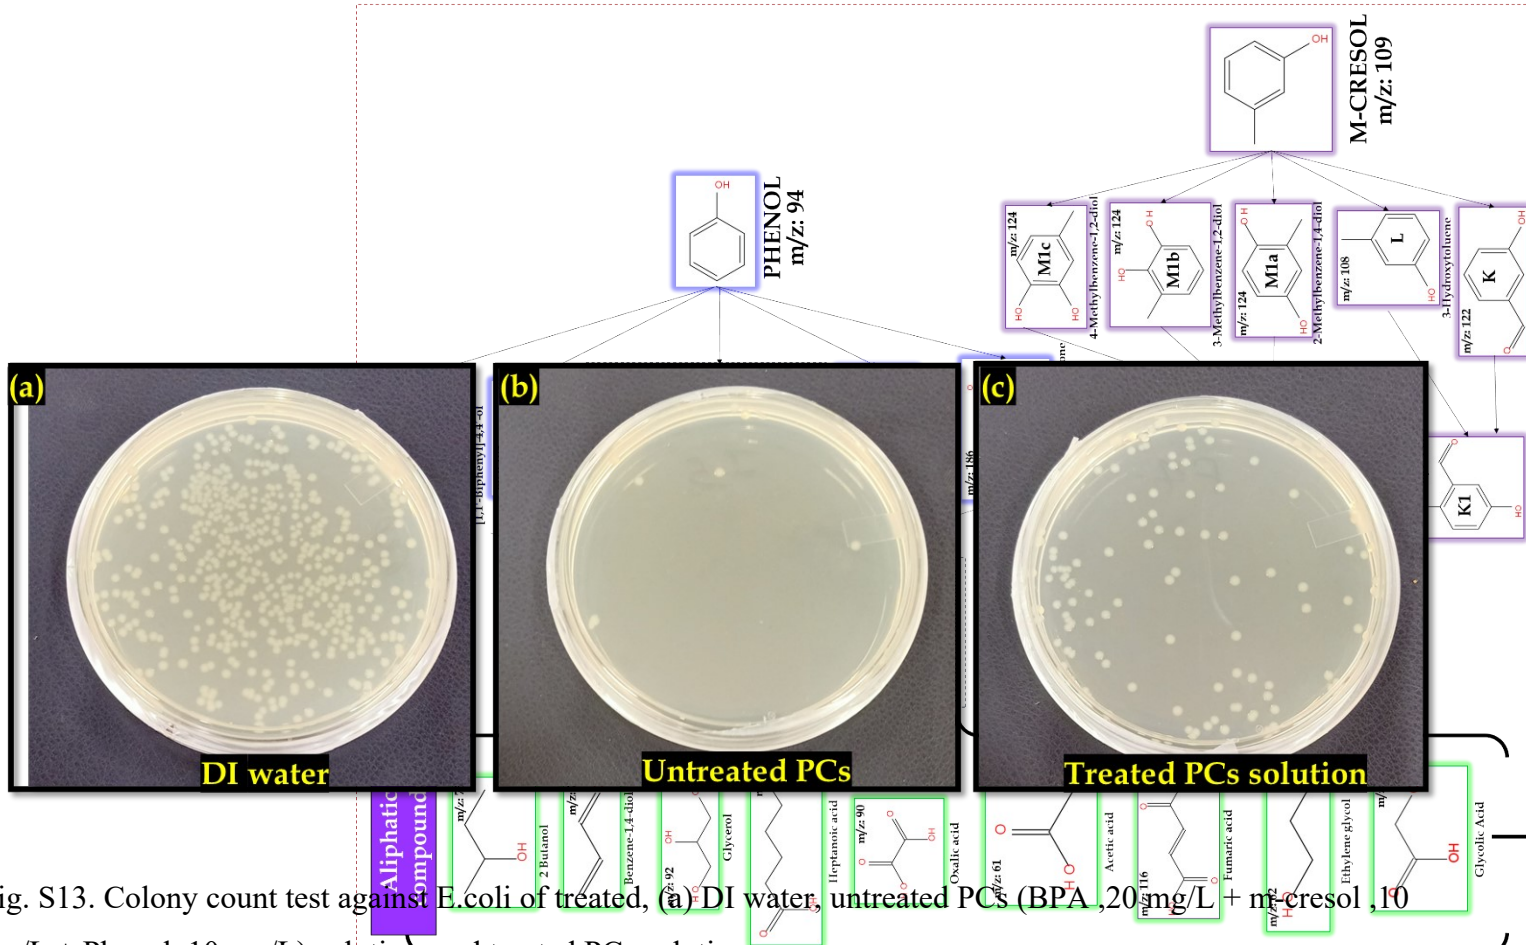

Fig. S13. Colony count test against *E. coli* of treated, (a) DI water, untreated PCs (BPA, 20 mg/L + m-cresol, 10 mg/L + Phenol, 10 mg/L) solution, and treated PCs solution.

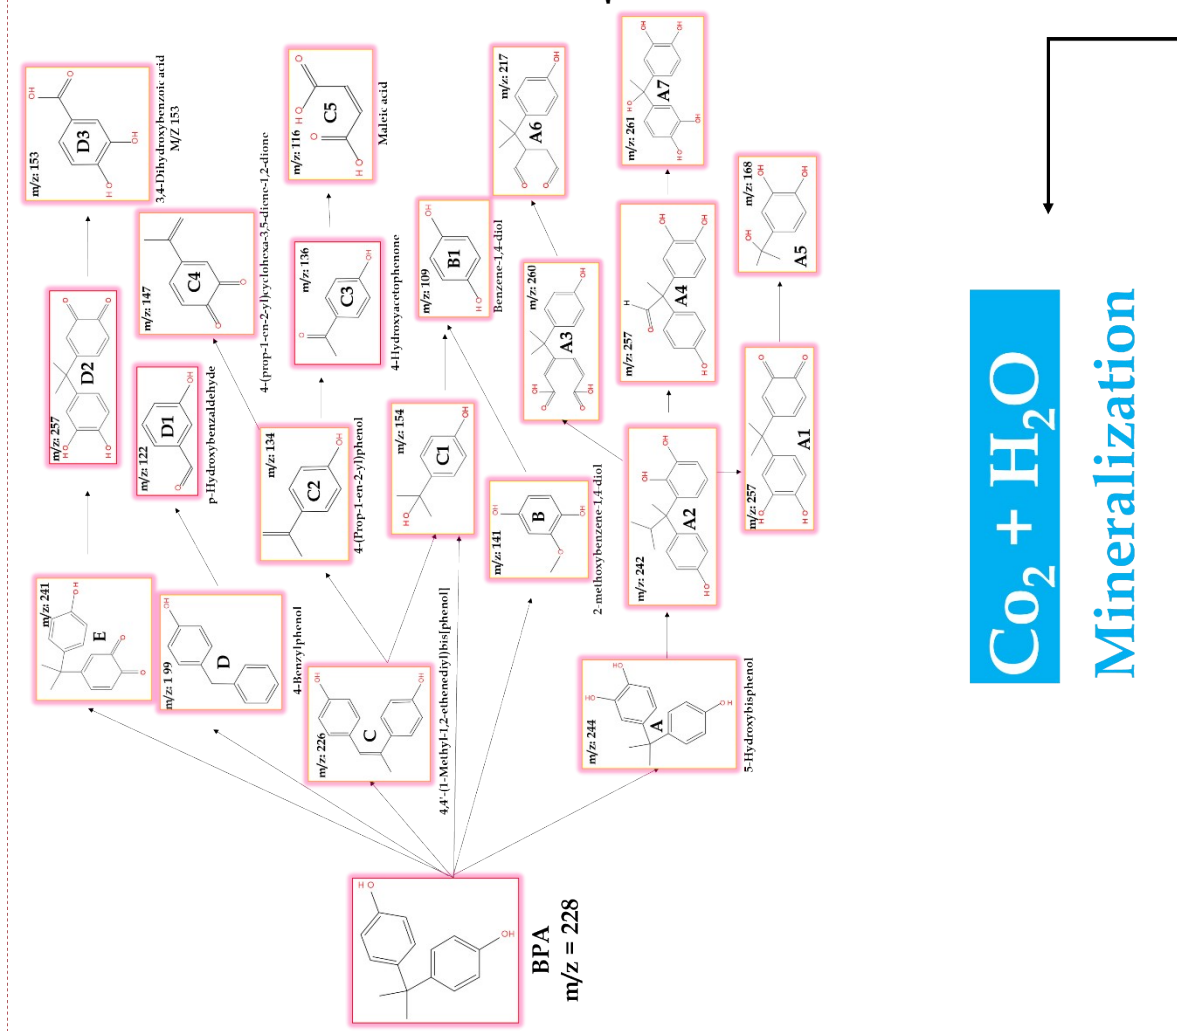

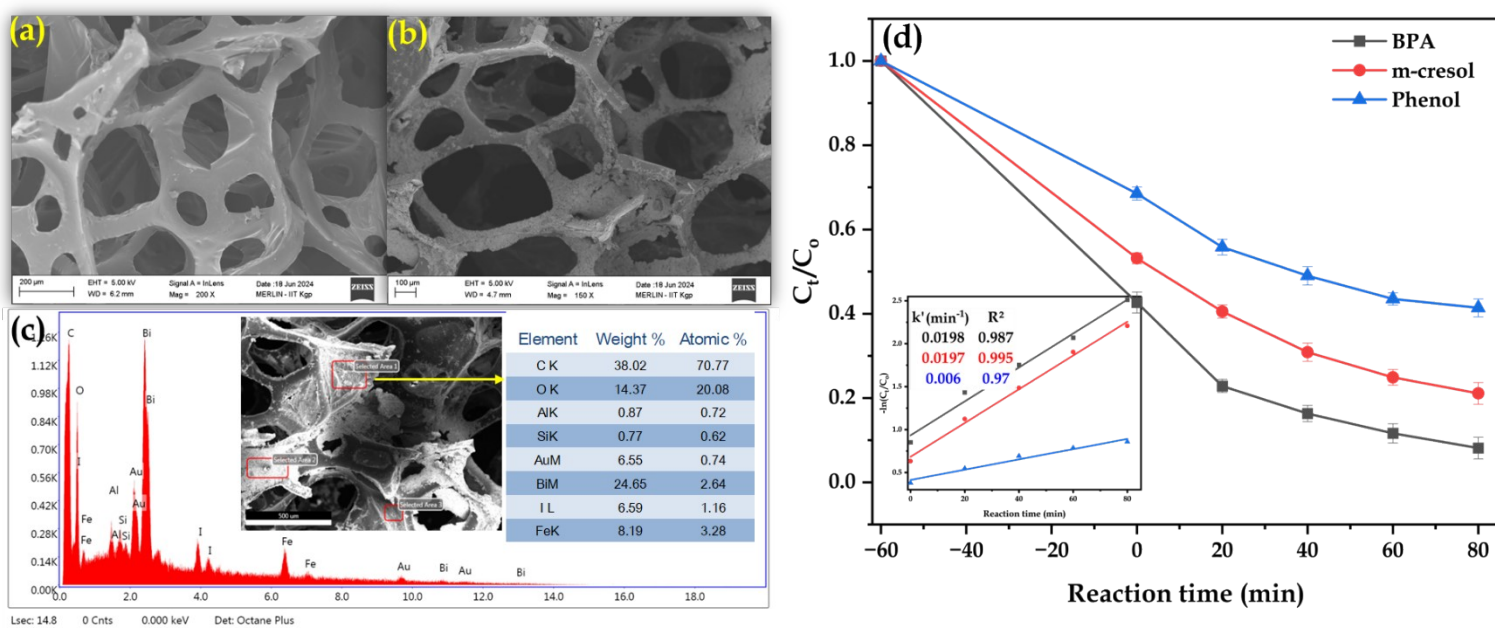

Fig. S14. FEG-SEM image of (a) pristine and (b) coated PU foam, (c) XRD pattern of unused and reused HBI-30, (b) FEG-SEM image of reused HBI-30, (c) EDAX analysis of HBI@PU, and (d) simultaneous degradation of phenolic compounds.
